# Supplementary material
Source: PubMed Central journal article supplement (PMC9555296)
Supplement: ehp10255.s001.acco.pdf [file ehp10255.s001.acco.pdf]

**Note to readers with disabilities:** *EHP* strives to ensure that all journal content is accessible to all readers. However, some figures and Supplemental Material published in *EHP* articles may not conform to [508 standards](#) due to the complexity of the information being presented. If you need assistance accessing journal content, please contact [ehp508@niehs.nih.gov](mailto:ehp508@niehs.nih.gov). Our staff will work with you to assess and meet your accessibility needs within 3 working days.

### **Supplemental Material**

#### **Evaluation of Neurotoxicity in BALB/c Mice following Chronic Exposure to Polystyrene Microplastics**

Haibo Jin, Chen Yang, Chengyue Jiang, Luxi Li, Mengge Pan, Dongmei Li, Xiaodong Han, and Jie Ding

#### **Table of Contents**

**Table S1.** Primer sequences used for qRT-PCR.

**Table S2.** Detailed information of primary antibodies.

**Table S3.** The mean and SD summary data for quantification.

**Table S4.** *P*-values for non-statistically and statistically significant results.

**Table S5.** Thigmotaxis of mice in Morris water maze test. Thigmotaxis is defined as mice were swimming in the outer 10% close to walls, which means mice swim almost exclusively in the periphery. The rate of thigmotaxis was expressed as the ratio of the number of mice showing thigmotaxis to the total number of mice according to the swim path trajectories.

**Figure S1.** Biodistribution of various diameters of polystyrene MPs (PS-MPs) in different tissues of mice. Mice were provided drinking water containing three sizes of fluorescent PS-MPs for 180 consecutive days. Fluorescence pictures of excised brain tissues and gastric tissues were detected. The colors in pictures indicated that fluorescence PS-MPs in tissues.

**Figure S2.** BBB integrity was detected by biotin tracer experiments. The sections were stained with biotin (red) and DAPI (blue). The existence of biotin in brain tissues was examined by immunofluorescence microscopy. The biotin signal of the liver parenchyma was used as a positive control (scale bar = 20  $\mu$ m).

**Figure S3.** Ultrastructure of BBB in PS-MP-exposed and unexposed mice as detected by an electron microscope. Upper images displayed the ultrastructure of BBB. Lower images referred to magnified boxed areas.

**Figure S4.** The average swim speed of mice on days 1-5 in Morris water maze test is shown. Circle (Control), square (100 µg/L), triangle (1000 µg/L). (A) Control and 0.5 µm PS-MPs exposure groups. (B) Control and 4 µm PS-MPs exposure groups. (C) Control and 10 µm PS-MPs exposure groups. The results are expressed as means ± SD (n = 10 mice/per group). The mean and SD summary data for quantification are shown in Table S3. *P*-Values for all comparisons are reported in Table S4. Data were detected by one-way analysis of variance (ANOVA) followed by Dunnett's multiple comparison tests.

**Figure S5.** The total path length to find the hidden platform of mice on days 1-5 in Morris water maze test are shown. Circle (Control), square (100 µg/L), triangle (1000 µg/L). (A) Control and 0.5 µm PS-MPs exposure groups. (B) Control and 4 µm PS-MPs exposure groups. (C) Control and 10 µm PS-MPs exposure groups. The results are expressed as means ± SD (n = 10 mice/per group). The mean and SD summary data for quantification are shown in Table S3. *P*-Values for all comparisons are reported in Table S4. \**P* < 0.05 vs. control, as detected by one-way analysis of variance (ANOVA) followed by Dunnett's multiple comparison tests.

**Figure S6.** The recognition scores (time spent (s) investigating one object/time spent (s) investigating both objects in total) of mice on day 1 (A) and day 2 (B) of novel object recognition (NOR) experiment were examined (n = 10 mice/per group). The mean and SD summary data for quantification are shown in Table S3. *P*-Values for all comparisons are reported in Table S4.

**Figure S7.** The total distance moved (A) and average movement speed (B) of mice in testing day (day 3) of the novel object recognition test are shown. The results are expressed as means ± SD (n = 10 mice/per group). The mean and SD summary data for quantification are shown in Table S3. *P*-Values for all comparisons are reported in Table S4. \**P* < 0.05 vs. control, as detected by one-way analysis of variance (ANOVA) followed by Dunnett's multiple comparison tests.

**Figure S8.** The numbers of neurons in the hippocampal cornu ammonis 1 (CA1), cornu ammonis 3 (CA3), and dentate gyrus (DG) sections were counted (n = 3 mice/group, n = 3 slides/mice). Data are shown as mean ± SD. The mean and SD summary data for quantification are shown in Table S3. *P*-Values for all comparisons are reported in Table S4. \**P* < 0.05 compared with control, as detected by one-way analysis of variance (ANOVA) followed by Dunnett's multiple comparison tests.

**Figure S9.** The mRNA levels of *caspase 3* (A), the *Bax/Bcl-2* mRNA ratio (B) in the hippocampus were tested with quantitative real-time PCR (qRT-PCR) by normalizing to *Gapdh*. The results are expressed as means ± SD (n = 3, N = 3 mice/group). The mean and SD summary data for quantification are shown in Table S3. *P*-Values for all comparisons are reported in Table S4. \**P* < 0.05 and \*\**P* < 0.01 compared with the control, as detected by one-way analysis of variance (ANOVA) followed by Dunnett's multiple comparison tests.

**Figure S10.** The expression of synapsin 1, synaptophysin, and PSD 95 protein in the hippocampus was measured via western blotting. The western blotting results were quantified and statistically analyzed, as shown in (Figure 7C) as mean ± SD (n = 3, N = 3 mice/group). The mean and SD summary data for quantification of western blotting are shown in Table S3. *P*-Values for all comparisons are reported in Table S4.

**Figure S11.** The mRNA expression levels of *Gap43*(A), *Syt 4* (B), and *Ncam*(C) were detected by qRT-PCR in the hippocampus of mice exposed to PS-MPs and control mice. Data are shown as mean  $\pm$  SD (n = 3). The mean and SD summary data for quantification are shown in Table S3. *P*-Values for all comparisons are reported in Table S4. \*\**P* < 0.01 compared with control, as detected by one-way analysis of variance (ANOVA) followed by Dunnett's multiple comparison tests.

**Figure S12.** (A) A confocal fluorescence microscope was used to detect colocalization of Alexa Fluor 594-labeled MCP-1 (red)/TNF- $\alpha$  (red) and DAPI (blue) (scale bar = 20  $\mu$ m, n = 3) in the hippocampus of mice exposed to PS-MPs and control mice. (B) Percent of positivity was calculated based on the percentage of MCP-1 positive cells out of the total number of cells in an image. (C) Percent of positivity was calculated based on the percentage of TNF- $\alpha$  positive cells out of the total number of cells in an image. Data are shown as mean  $\pm$  SD (n = 3). The mean and SD summary data for quantification are shown in Table S3. *P*-Values for all comparisons are reported in Table S4. \**P* < 0.05, \*\**P* < 0.01 compared with control, as detected by one-way analysis of variance (ANOVA) followed by Dunnett's multiple comparison tests.

**Table S1.** Primer sequences used for qRT-PCR.

| Accession number | Gene             | Primer  | Sequence 5' → 3'         | Product size (base pairs) |
|------------------|------------------|---------|--------------------------|---------------------------|
| NM_001289726.1   | <i>Gapdh</i>     | Forward | AGGTCGGTGTGAACGGATTTG    | 178                       |
|                  |                  | Reverse | TGTAGACCATGTAGTTGAGTCA   |                           |
| NM_001048139.1   | <i>Bdnf</i>      | Forward | TCATACTTCGGTTGCATGAAGG   | 137                       |
|                  |                  | Reverse | AGACCTCTCGAACCTGCCC      |                           |
| NM_001252341.1   | <i>Syt 1</i>     | Forward | CTGTCACCACTGTTGCGAC      | 130                       |
|                  |                  | Reverse | GGCAATGGGATTTTATGCAGTTC  |                           |
| NM_009308.3      | <i>Syt 4</i>     | Forward | TGCTTTTGGCCTCGTCTTCA     | 192                       |
|                  |                  | Reverse | GCGGTTTTACCCTTCACTTCAC   |                           |
| NM_001081445.1   | <i>Ncam</i>      | Forward | GACAGAACCCGAAAAGGGC      | 94                        |
|                  |                  | Reverse | GTTGGGGACCGTCTTGACTT     |                           |
| NM_008083.2      | <i>Gap43</i>     | Forward | TGGTGTCAAGCCGGAAGATAA    | 114                       |
|                  |                  | Reverse | GCTGGTGCATCACCTTCT       |                           |
| NM_001278601.1   | <i>Tnf-α</i>     | Forward | TCCCAGGTTCTCTTCAAGGGA    | 51                        |
|                  |                  | Reverse | GGTGAGGAGCACGTAGTCGG     |                           |
| NM_011333.3      | <i>Mcp-1</i>     | Forward | TTAAAAACCTGGATCGGAACCAA  | 121                       |
|                  |                  | Reverse | GCATTAGCTTCAGATTTACGGGT  |                           |
| NM_021274.2      | <i>Cxcl10</i>    | Forward | CCAAGTGCTGCCGTCATTTTC    | 157                       |
|                  |                  | Reverse | GGCTCGCAGGGATGATTTCAA    |                           |
| NM_031168.2      | <i>Il-6</i>      | Forward | TAGTCCTTCCTACCCCAATTTCC  | 76                        |
|                  |                  | Reverse | TTGGTCCTTAGCCACTCCTTC    |                           |
| NM_008361.4      | <i>Il-1β</i>     | Forward | GCAACTGTTCTGAACTCAACT    | 89                        |
|                  |                  | Reverse | ATCTTTTGGGGTCCGTCAACT    |                           |
| NM_009810.3      | <i>Caspase 3</i> | Forward | ATGGAGAACAACAAAACCTCAGT  | 74                        |
|                  |                  | Reverse | TTGCTCCCATGTATGGTCTTTAC  |                           |
| NM_007527.3      | <i>Bax</i>       | Forward | TGAAGACAGGGGCCTTTTTG     | 140                       |
|                  |                  | Reverse | AATTCGCCGGAGACTCG        |                           |
| NM_009741.5      | <i>Bcl-2</i>     | Forward | ATGCCTTTGTGGA ACTATATGGC | 120                       |
|                  |                  | Reverse | GGTATGCACCCAGAGTGATGC    |                           |

**Table S2.** Detailed information of primary antibodies.

| antibody           | species              | company     | catalog    | dilution    |
|--------------------|----------------------|-------------|------------|-------------|
| Anti-GAPDH         | mouse mAb            | Proteintech | 60004-1-Ig | 1:1000 (WB) |
| Anti-PSD95         | rabbit polyclonal Ab | Proteintech | 20665-1-AP | 1:1000 (WB) |
| Anti-synaptophysin | rabbit polyclonal Ab | Proteintech | 17785-1-AP | 1:1000 (WB) |
| Anti-synapsin 1    | rabbit polyclonal Ab | Proteintech | 20258-1-AP | 1:1000 (WB) |

**Table S3.** The mean and SD summary data for quantification.

|                                                                                                                  |        |       |        |       |
|------------------------------------------------------------------------------------------------------------------|--------|-------|--------|-------|
| <b>Figure 1C: zeta potential</b>                                                                                 | mean   | SD    |        |       |
| (mV)                                                                                                             |        |       |        |       |
| 0.5 $\mu\text{m}$                                                                                                | -31.10 | 0.64  |        |       |
| 4 $\mu\text{m}$                                                                                                  | -37.53 | 0.75  |        |       |
| 10 $\mu\text{m}$                                                                                                 | -29.97 | 0.50  |        |       |
| <b>Figure 4B: Time for mice (exposed or not to PS-MPs) to find the platform during learning trials (seconds)</b> |        |       |        |       |
|                                                                                                                  | mean   | SD    | mean   | SD    |
|                                                                                                                  | Day 1  |       | Day2   |       |
| Control                                                                                                          | 78.53  | 19.19 | 52.01  | 30.15 |
| 0.5 $\mu\text{m}$ 100 $\mu\text{g/L}$                                                                            | 71.82  | 28.44 | 52.08  | 30.15 |
| 0.5 $\mu\text{m}$ 1000 $\mu\text{g/L}$                                                                           | 65.94  | 32.08 | 63.7   | 25.88 |
| 4 $\mu\text{m}$ 100 $\mu\text{g/L}$                                                                              | 71.16  | 20.79 | 63.585 | 25.60 |
| 4 $\mu\text{m}$ 1000 $\mu\text{g/L}$                                                                             | 82.21  | 13.72 | 69.28  | 21.20 |
| 10 $\mu\text{m}$ 100 $\mu\text{g/L}$                                                                             | 75.25  | 27.71 | 64.13  | 28.17 |
| 10 $\mu\text{m}$ 1000 $\mu\text{g/L}$                                                                            | 67.46  | 25.12 | 66.57  | 31.26 |
|                                                                                                                  | Day 3  |       | Day 4  |       |
| Control                                                                                                          | 55.31  | 31.10 | 39.63  | 29.75 |
| 0.5 $\mu\text{m}$ 100 $\mu\text{g/L}$                                                                            | 50.02  | 31.28 | 50.37  | 24.42 |
| 0.5 $\mu\text{m}$ 1000 $\mu\text{g/L}$                                                                           | 54.72  | 30.66 | 51.54  | 27.95 |
| 4 $\mu\text{m}$ 100 $\mu\text{g/L}$                                                                              | 61.33  | 24.31 | 48.52  | 28.35 |

|                                                                                                            |       |       |       |       |
|------------------------------------------------------------------------------------------------------------|-------|-------|-------|-------|
| 4 µm 1000 µg/L                                                                                             | 65.79 | 29.00 | 60.03 | 28.57 |
| 10 µm 100 µg/L                                                                                             | 47.87 | 28.94 | 48.52 | 31.71 |
| 10 µm 1000 µg/L                                                                                            | 70.06 | 26.77 | 67.43 | 29.61 |
|                                                                                                            | Day 5 |       |       |       |
| Control                                                                                                    | 25.40 | 13.85 |       |       |
| 0.5 µm 100 µg/L                                                                                            | 33.04 | 24.52 |       |       |
| 0.5 µm 1000 µg/L                                                                                           | 40.34 | 30.64 |       |       |
| 4 µm 100 µg/L                                                                                              | 37.59 | 24.74 |       |       |
| 4 µm 1000 µg/L                                                                                             | 46.81 | 21.80 |       |       |
| 10 µm 100 µg/L                                                                                             | 38.39 | 32.72 |       |       |
| 10 µm 1000 µg/L                                                                                            | 54.72 | 26.76 |       |       |
| <b>Figure 4D: Number of times mice (exposed or not to PS-MPs) crossed the target platform on sixth day</b> |       |       |       |       |
|                                                                                                            | mean  | SD    |       |       |
| Control                                                                                                    | 3.75  | 1.85  |       |       |
| 0.5 µm 100 µg/L                                                                                            | 1.25  | 0.97  |       |       |
| 0.5 µm 1000 µg/L                                                                                           | 0.875 | 1.05  |       |       |
| 4 µm 100 µg/L                                                                                              | 1.00  | 1.00  |       |       |
| 4 µm 1000 µg/L                                                                                             | 0.625 | 0.70  |       |       |
| 10 µm 100 µg/L                                                                                             | 1.25  | 0.83  |       |       |
| 10 µm 1000 µg/L                                                                                            | 0.75  | 0.83  |       |       |
|                                                                                                            |       |       |       |       |

**Figure 4E: Percentage of time mice (exposed or not to PS-MPs) took in the quadrant of the target platform (sixth day)**

|                                        | mean  | SD    |  |  |
|----------------------------------------|-------|-------|--|--|
| Control                                | 44.37 | 12.80 |  |  |
| 0.5 $\mu\text{m}$ 100 $\mu\text{g/L}$  | 25.72 | 17.17 |  |  |
| 0.5 $\mu\text{m}$ 1000 $\mu\text{g/L}$ | 24.03 | 19.16 |  |  |
| 4 $\mu\text{m}$ 100 $\mu\text{g/L}$    | 32.40 | 15.68 |  |  |
| 4 $\mu\text{m}$ 1000 $\mu\text{g/L}$   | 16.87 | 15.47 |  |  |
| 10 $\mu\text{m}$ 100 $\mu\text{g/L}$   | 22.44 | 12.93 |  |  |
| 10 $\mu\text{m}$ 1000 $\mu\text{g/L}$  | 20.06 | 9.77  |  |  |

**Figure 5C: Novelty scores (time spent (s) investigating novel object/time spent (s) investigating both objects in total for mice exposed or not to PS-MPs)**

|                                        | mean | SD   |  |  |
|----------------------------------------|------|------|--|--|
| Control                                | 0.46 | 0.07 |  |  |
| 0.5 $\mu\text{m}$ 100 $\mu\text{g/L}$  | 0.26 | 0.13 |  |  |
| 0.5 $\mu\text{m}$ 1000 $\mu\text{g/L}$ | 0.24 | 0.13 |  |  |
| 4 $\mu\text{m}$ 100 $\mu\text{g/L}$    | 0.27 | 0.13 |  |  |
| 4 $\mu\text{m}$ 1000 $\mu\text{g/L}$   | 0.26 | 0.07 |  |  |
| 10 $\mu\text{m}$ 100 $\mu\text{g/L}$   | 0.26 | 0.13 |  |  |
| 10 $\mu\text{m}$ 1000 $\mu\text{g/L}$  | 0.22 | 0.09 |  |  |

| <b>Figure 7B: Number of dendritic spines in hippocampus of mice exposed or not to PS-MPs</b>              |        |        |  |  |
|-----------------------------------------------------------------------------------------------------------|--------|--------|--|--|
|                                                                                                           | mean   | SD     |  |  |
| Control                                                                                                   | 12.25  | 0.83   |  |  |
| 0.5 $\mu\text{m}$ 1000 $\mu\text{g/L}$                                                                    | 6.50   | 0.50   |  |  |
| 4 $\mu\text{m}$ 1000 $\mu\text{g/L}$                                                                      | 4.50   | 0.50   |  |  |
| 10 $\mu\text{m}$ 1000 $\mu\text{g/L}$                                                                     | 5.25   | 1.09   |  |  |
| <b>Figure 7C: Protein expression of synapsin 1 in the hippocampus of mice exposed or not to PS-MPs</b>    |        |        |  |  |
| <b>Synapsin/GAPDH ratio</b>                                                                               | mean   | SD     |  |  |
| Control                                                                                                   | 1.0222 | 0.0299 |  |  |
| 0.5 $\mu\text{m}$ 100 $\mu\text{g/L}$                                                                     | 0.7478 | 0.0935 |  |  |
| 0.5 $\mu\text{m}$ 1000 $\mu\text{g/L}$                                                                    | 0.4472 | 0.0523 |  |  |
| 4 $\mu\text{m}$ 100 $\mu\text{g/L}$                                                                       | 0.7969 | 0.0932 |  |  |
| 4 $\mu\text{m}$ 1000 $\mu\text{g/L}$                                                                      | 0.5002 | 0.0585 |  |  |
| 10 $\mu\text{m}$ 100 $\mu\text{g/L}$                                                                      | 0.8760 | 0.1095 |  |  |
| 10 $\mu\text{m}$ 1000 $\mu\text{g/L}$                                                                     | 0.6659 | 0.0778 |  |  |
| <b>Figure 7C: Protein expression of synaptophysin in the hippocampus of mice exposed or not to PS-MPs</b> |        |        |  |  |
| <b>Synaptophysin/GAPDH ratio</b>                                                                          | mean   | SD     |  |  |
| Control                                                                                                   | 1.0039 | 0.0236 |  |  |



|                  |        |        |  |  |
|------------------|--------|--------|--|--|
| 0.5 µm 100 µg/L  | 0.7508 | 0.0576 |  |  |
| 0.5 µm 1000 µg/L | 0.3228 | 0.1531 |  |  |
| 4 µm 100 µg/L    | 0.5738 | 0.0705 |  |  |
| 4 µm 1000 µg/L   | 0.3609 | 0.0616 |  |  |
| 10 µm 100 µg/L   | 0.5631 | 0.0672 |  |  |
| 10 µm 1000 µg/L  | 0.2965 | 0.1265 |  |  |

**Figure 7C: Protein expression of PSD95 in the hippocampus of mice exposed or not to PS-MPs**

| <b>PSD95/GAPDH ratio</b> | mean   | SD     |  |  |
|--------------------------|--------|--------|--|--|
| Control                  | 1.0097 | 0.0159 |  |  |
| 0.5 µm 100 µg/L          | 0.7614 | 0.0743 |  |  |
| 0.5 µm 1000 µg/L         | 0.4557 | 0.0828 |  |  |
| 4 µm 100 µg/L            | 0.7880 | 0.0754 |  |  |
| 4 µm 1000 µg/L           | 0.4572 | 0.0446 |  |  |
| 10 µm 100 µg/L           | 0.8130 | 0.1168 |  |  |
| 10 µm 1000 µg/L          | 0.8368 | 0.0817 |  |  |

**Figure 7D: mRNA expression of *Bdnf* in the hippocampus of mice exposed or not to PS-MPs**

| <b><i>Bdnf</i>/Gapdh ratio</b> | mean   | SD     |  |  |
|--------------------------------|--------|--------|--|--|
| Control                        | 1.0015 | 0.0397 |  |  |
| 0.5 µm 100 µg/L                | 0.6347 | 0.0382 |  |  |
| 0.5 µm 1000 µg/L               | 0.7628 | 0.0121 |  |  |

|                 |        |        |  |  |
|-----------------|--------|--------|--|--|
| 4 µm 100 µg/L   | 0.7141 | 0.0634 |  |  |
| 4 µm 1000 µg/L  | 0.7258 | 0.0457 |  |  |
| 10 µm 100 µg/L  | 0.6733 | 0.0411 |  |  |
| 10 µm 1000 µg/L | 0.6889 | 0.0312 |  |  |

**Figure 7E: mRNA expression of *syt1* in the hippocampus of mice exposed or not to PS-MPs**

| <i>syt1/Gapdh</i> ratio | mean   | SD     |  |  |
|-------------------------|--------|--------|--|--|
| Control                 | 1.0009 | 0.0275 |  |  |
| 0.5 µm 100 µg/L         | 0.7317 | 0.0592 |  |  |
| 0.5 µm 1000 µg/L        | 0.8920 | 0.0336 |  |  |
| 4 µm 100 µg/L           | 0.9568 | 0.0192 |  |  |
| 4 µm 1000 µg/L          | 0.8523 | 0.0023 |  |  |
| 10 µm 100 µg/L          | 0.8485 | 0.0230 |  |  |
| 10 µm 1000 µg/L         | 0.8965 | 0.0141 |  |  |

**Figure 8: Expression various inflammation-related mRNAs in the hippocampus of mice exposed or not to PS-MPs**

| <i>Tnf-α/Gapdh</i> ratio | mean    | SD     |  |  |
|--------------------------|---------|--------|--|--|
| Control                  | 1.0004  | 0.0344 |  |  |
| 0.5 µm 100 µg/L          | 2.2895  | 0.3995 |  |  |
| 0.5 µm 1000 µg/L         | 4.5516  | 0.5359 |  |  |
| 4 µm 100 µg/L            | 5.4554  | 0.7650 |  |  |
| 4 µm 1000 µg/L           | 14.0082 | 1.4922 |  |  |

|                                 |         |        |  |  |
|---------------------------------|---------|--------|--|--|
| 10 µm 100 µg/L                  | 3.3178  | 0.5503 |  |  |
| 10 µm 1000 µg/L                 | 4.5896  | 0.0068 |  |  |
|                                 |         |        |  |  |
| <b><i>Mcp-1/Gapdh ratio</i></b> | mean    | SD     |  |  |
| Control                         | 1.0162  | 0.1777 |  |  |
| 0.5 µm 100 µg/L                 | 2.1331  | 0.3062 |  |  |
| 0.5 µm 1000 µg/L                | 7.2351  | 2.2340 |  |  |
| 4 µm 100 µg/L                   | 4.5054  | 0.8103 |  |  |
| 4 µm 1000 µg/L                  | 10.8836 | 2.9398 |  |  |
| 10 µm 100 µg/L                  | 7.2899  | 1.8559 |  |  |
| 10 µm 1000 µg/L                 | 12.4737 | 1.7237 |  |  |
|                                 |         |        |  |  |
| <b><i>Il-6/Gapdh ratio</i></b>  | mean    | SD     |  |  |
| Control                         | 1.0261  | 0.2181 |  |  |
| 0.5 µm 100 µg/L                 | 1.1366  | 0.0387 |  |  |
| 0.5 µm 1000 µg/L                | 1.2323  | 0.0274 |  |  |
| 4 µm 100 µg/L                   | 1.3007  | 0.0333 |  |  |
| 4 µm 1000 µg/L                  | 1.1565  | 0.0153 |  |  |
| 10 µm 100 µg/L                  | 1.0271  | 0.0076 |  |  |
| 10 µm 1000 µg/L                 | 1.0865  | 0.0667 |  |  |
|                                 |         |        |  |  |
| <b><i>Il-1β/Gapdh ratio</i></b> | mean    | SD     |  |  |

|                                                                                                                         |        |        |       |      |
|-------------------------------------------------------------------------------------------------------------------------|--------|--------|-------|------|
| Control                                                                                                                 | 1.0066 | 0.1162 |       |      |
| 0.5 $\mu\text{m}$ 100 $\mu\text{g/L}$                                                                                   | 1.6457 | 0.0567 |       |      |
| 0.5 $\mu\text{m}$ 1000 $\mu\text{g/L}$                                                                                  | 1.8675 | 0.3591 |       |      |
| 4 $\mu\text{m}$ 100 $\mu\text{g/L}$                                                                                     | 1.9543 | 0.3027 |       |      |
| 4 $\mu\text{m}$ 1000 $\mu\text{g/L}$                                                                                    | 3.1457 | 0.6149 |       |      |
| 10 $\mu\text{m}$ 100 $\mu\text{g/L}$                                                                                    | 2.8568 | 0.6061 |       |      |
| 10 $\mu\text{m}$ 1000 $\mu\text{g/L}$                                                                                   | 3.8213 | 0.5092 |       |      |
|                                                                                                                         |        |        |       |      |
| <b><i>Cxcl10/Gapdh</i> ratio</b>                                                                                        | mean   | SD     |       |      |
| Control                                                                                                                 | 1.0086 | 0.1404 |       |      |
| 0.5 $\mu\text{m}$ 100 $\mu\text{g/L}$                                                                                   | 3.9309 | 0.5711 |       |      |
| 0.5 $\mu\text{m}$ 1000 $\mu\text{g/L}$                                                                                  | 3.1314 | 0.7554 |       |      |
| 4 $\mu\text{m}$ 100 $\mu\text{g/L}$                                                                                     | 5.3048 | 0.1642 |       |      |
| 4 $\mu\text{m}$ 1000 $\mu\text{g/L}$                                                                                    | 4.4966 | 0.8317 |       |      |
| 10 $\mu\text{m}$ 100 $\mu\text{g/L}$                                                                                    | 4.1451 | 0.5905 |       |      |
| 10 $\mu\text{m}$ 1000 $\mu\text{g/L}$                                                                                   | 6.1071 | 1.5465 |       |      |
| <b>Figure S4: Average swim speed (mm/s) on days 1-5 in the Morris water maze test for mice exposed or not to PS-MPs</b> |        |        |       |      |
|                                                                                                                         | mean   | SD     | mean  | SD   |
|                                                                                                                         | Day 1  |        | Day 2 |      |
| Control                                                                                                                 | 7.23   | 3.47   | 9.07  | 3.06 |
| 0.5 $\mu\text{m}$ 100 $\mu\text{g/L}$                                                                                   | 10.63  | 3.39   | 10.63 | 3.37 |

|                                        |       |      |       |      |
|----------------------------------------|-------|------|-------|------|
| 0.5 $\mu\text{m}$ 1000 $\mu\text{g/L}$ | 10.51 | 2.13 | 9.93  | 2.43 |
| 4 $\mu\text{m}$ 100 $\mu\text{g/L}$    | 9.70  | 1.63 | 11.41 | 3.14 |
| 4 $\mu\text{m}$ 1000 $\mu\text{g/L}$   | 9.72  | 2.89 | 11.57 | 2.61 |
| 10 $\mu\text{m}$ 100 $\mu\text{g/L}$   | 10.69 | 2.78 | 10.20 | 3.69 |
| 10 $\mu\text{m}$ 1000 $\mu\text{g/L}$  | 7.00  | 3.39 | 8.01  | 3.08 |
|                                        | Day 3 |      | Day 4 |      |
| Control                                | 9.60  | 2.40 | 8.94  | 4.48 |
| 0.5 $\mu\text{m}$ 100 $\mu\text{g/L}$  | 6.15  | 4.31 | 8.90  | 3.38 |
| 0.5 $\mu\text{m}$ 1000 $\mu\text{g/L}$ | 8.13  | 4.14 | 6.99  | 4.12 |
| 4 $\mu\text{m}$ 100 $\mu\text{g/L}$    | 10.37 | 2.76 | 8.19  | 2.65 |
| 4 $\mu\text{m}$ 1000 $\mu\text{g/L}$   | 10.64 | 3.59 | 6.70  | 3.85 |
| 10 $\mu\text{m}$ 100 $\mu\text{g/L}$   | 12.04 | 3.15 | 8.47  | 1.91 |
| 10 $\mu\text{m}$ 1000 $\mu\text{g/L}$  | 7.19  | 3.74 | 5.65  | 3.53 |
|                                        | Day 5 |      |       |      |
| Control                                | 6.99  | 3.41 |       |      |
| 0.5 $\mu\text{m}$ 100 $\mu\text{g/L}$  | 8.95  | 4.36 |       |      |
| 0.5 $\mu\text{m}$ 1000 $\mu\text{g/L}$ | 7.53  | 2.92 |       |      |
| 4 $\mu\text{m}$ 100 $\mu\text{g/L}$    | 8.46  | 3.27 |       |      |
| 4 $\mu\text{m}$ 1000 $\mu\text{g/L}$   | 8.70  | 3.32 |       |      |
| 10 $\mu\text{m}$ 100 $\mu\text{g/L}$   | 10.11 | 2.88 |       |      |
| 10 $\mu\text{m}$ 1000 $\mu\text{g/L}$  | 5.79  | 3.98 |       |      |
|                                        |       |      |       |      |

**Figure S5: Total path length to find the hidden platform (mm) of mice exposed or not to PS-MPs on days 1-5 in Morris water maze test**

|                                        | mean   | SD     | mean   | SD     |
|----------------------------------------|--------|--------|--------|--------|
|                                        | Day 1  |        | Day 2  |        |
| Control                                | 605.28 | 302.50 | 484.55 | 328.86 |
| 0.5 $\mu\text{m}$ 100 $\mu\text{g/L}$  | 751.98 | 403.53 | 462.85 | 177.71 |
| 0.5 $\mu\text{m}$ 1000 $\mu\text{g/L}$ | 661.03 | 326.06 | 607.90 | 270.06 |
| 4 $\mu\text{m}$ 100 $\mu\text{g/L}$    | 699.20 | 218.69 | 668.47 | 382.04 |
| 4 $\mu\text{m}$ 1000 $\mu\text{g/L}$   | 807.78 | 297.77 | 817.31 | 330.70 |
| 10 $\mu\text{m}$ 100 $\mu\text{g/L}$   | 770.91 | 268.20 | 601.62 | 293.47 |
| 10 $\mu\text{m}$ 1000 $\mu\text{g/L}$  | 561.54 | 291.52 | 551.15 | 306.82 |
|                                        | Day 3  |        | Day 4  |        |
| Control                                | 546.82 | 376.23 | 347.48 | 290.25 |
| 0.5 $\mu\text{m}$ 100 $\mu\text{g/L}$  | 259.47 | 339.36 | 487.42 | 313.87 |
| 0.5 $\mu\text{m}$ 1000 $\mu\text{g/L}$ | 440.49 | 419.87 | 395.86 | 296.70 |
| 4 $\mu\text{m}$ 100 $\mu\text{g/L}$    | 608.05 | 258.77 | 382.22 | 245.75 |
| 4 $\mu\text{m}$ 1000 $\mu\text{g/L}$   | 643.65 | 318.67 | 407.91 | 311.49 |
| 10 $\mu\text{m}$ 100 $\mu\text{g/L}$   | 747.16 | 339.14 | 394.88 | 220.00 |
| 10 $\mu\text{m}$ 1000 $\mu\text{g/L}$  | 440.00 | 313.13 | 348.95 | 308.49 |
|                                        | Day 5  |        |        |        |
| Control                                | 184.70 | 129.15 |        |        |
| 0.5 $\mu\text{m}$ 100 $\mu\text{g/L}$  | 318.53 | 313.21 |        |        |

|                  |        |        |  |  |
|------------------|--------|--------|--|--|
| 0.5 µm 1000 µg/L | 251.68 | 234.49 |  |  |
| 4 µm 100 µg/L    | 324.23 | 248.26 |  |  |
| 4 µm 1000 µg/L   | 377.74 | 187.09 |  |  |
| 10 µm 100 µg/L   | 442.81 | 414.12 |  |  |
| 10 µm 1000 µg/L  | 230.22 | 115.40 |  |  |

**Figure S6A: The recognition scores (time spent (s) investigating one object/time spent (s) investigating both objects in total) of mice exposed or not to PS-MPs on day 1**

|                  | mean | SD   |  |  |
|------------------|------|------|--|--|
| Control          | 0.50 | 0.01 |  |  |
| 0.5 µm 100 µg/L  | 0.50 | 0.01 |  |  |
| 0.5 µm 1000 µg/L | 0.50 | 0.01 |  |  |
| 4 µm 100 µg/L    | 0.50 | 0.01 |  |  |
| 4 µm 1000 µg/L   | 0.49 | 0.01 |  |  |
| 10 µm 100 µg/L   | 0.49 | 0.01 |  |  |
| 10 µm 1000 µg/L  | 0.50 | 0.01 |  |  |

**Figure S6B: The recognition scores (time spent (s) investigating one object/time spent (s) investigating both objects in total) of mice exposed or not to PS-MPs on day 2**

|                  | mean | SD   |  |  |
|------------------|------|------|--|--|
| Control          | 0.50 | 0.01 |  |  |
| 0.5 µm 100 µg/L  | 0.50 | 0.01 |  |  |
| 0.5 µm 1000 µg/L | 0.51 | 0.01 |  |  |
| 4 µm 100 µg/L    | 0.50 | 0.01 |  |  |

|                                                                                                                                              |       |       |  |  |
|----------------------------------------------------------------------------------------------------------------------------------------------|-------|-------|--|--|
| 4 $\mu\text{m}$ 1000 $\mu\text{g/L}$                                                                                                         | 0.50  | 0.01  |  |  |
| 10 $\mu\text{m}$ 100 $\mu\text{g/L}$                                                                                                         | 0.50  | 0.01  |  |  |
| 10 $\mu\text{m}$ 1000 $\mu\text{g/L}$                                                                                                        | 0.49  | 0.01  |  |  |
| <b>Figure S7A: The total distance moved (m) for mice (exposed or not to PS-MPs) in the novel object recognition testing day (day 3)</b>      |       |       |  |  |
|                                                                                                                                              | mean  | SD    |  |  |
| Control                                                                                                                                      | 4.10  | 0.80  |  |  |
| 0.5 $\mu\text{m}$ 100 $\mu\text{g/L}$                                                                                                        | 4.04  | 1.05  |  |  |
| 0.5 $\mu\text{m}$ 1000 $\mu\text{g/L}$                                                                                                       | 3.63  | 0.97  |  |  |
| 4 $\mu\text{m}$ 100 $\mu\text{g/L}$                                                                                                          | 3.95  | 1.32  |  |  |
| 4 $\mu\text{m}$ 1000 $\mu\text{g/L}$                                                                                                         | 3.37  | 1.29  |  |  |
| 10 $\mu\text{m}$ 100 $\mu\text{g/L}$                                                                                                         | 3.63  | 1.21  |  |  |
| 10 $\mu\text{m}$ 1000 $\mu\text{g/L}$                                                                                                        | 2.73  | 1.11  |  |  |
| <b>Figure S7B: The average movement speed (mm/s) for mice (exposed or not to PS-MPs) in the novel object recognition testing day (day 3)</b> |       |       |  |  |
|                                                                                                                                              | mean  | SD    |  |  |
| Control                                                                                                                                      | 34.19 | 6.63  |  |  |
| 0.5 $\mu\text{m}$ 100 $\mu\text{g/L}$                                                                                                        | 33.66 | 8.75  |  |  |
| 0.5 $\mu\text{m}$ 1000 $\mu\text{g/L}$                                                                                                       | 30.23 | 8.06  |  |  |
| 4 $\mu\text{m}$ 100 $\mu\text{g/L}$                                                                                                          | 32.90 | 11.03 |  |  |
| 4 $\mu\text{m}$ 1000 $\mu\text{g/L}$                                                                                                         | 28.06 | 10.79 |  |  |
| 10 $\mu\text{m}$ 100 $\mu\text{g/L}$                                                                                                         | 30.23 | 10.08 |  |  |



|                                                                                               |       |      |  |  |
|-----------------------------------------------------------------------------------------------|-------|------|--|--|
| 10 µm 1000 µg/L                                                                               | 22.73 | 9.29 |  |  |
| <b>Figure S8A: Number of neurons in the hippocampal CA1 for mice exposed or not to PS-MPs</b> |       |      |  |  |
|                                                                                               | mean  | SD   |  |  |
| Control                                                                                       | 1.01  | 0.02 |  |  |
| 0.5 µm 100 µg/L                                                                               | 1.00  | 0.03 |  |  |
| 0.5 µm 1000 µg/L                                                                              | 0.98  | 0.04 |  |  |
| 4 µm 100 µg/L                                                                                 | 0.97  | 0.04 |  |  |
| 4 µm 1000 µg/L                                                                                | 0.97  | 0.04 |  |  |
| 10 µm 100 µg/L                                                                                | 0.99  | 0.03 |  |  |
| 10 µm 1000 µg/L                                                                               | 0.99  | 0.05 |  |  |
| <b>Figure S8B: Number of neurons in the hippocampal CA3 for mice exposed or not to PS-MPs</b> |       |      |  |  |
|                                                                                               | mean  | SD   |  |  |
| Control                                                                                       | 1.02  | 0.03 |  |  |
| 0.5 µm 100 µg/L                                                                               | 0.98  | 0.03 |  |  |
| 0.5 µm 1000 µg/L                                                                              | 0.98  | 0.03 |  |  |
| 4 µm 100 µg/L                                                                                 | 0.95  | 0.06 |  |  |
| 4 µm 1000 µg/L                                                                                | 0.98  | 0.06 |  |  |
| 10 µm 100 µg/L                                                                                | 0.98  | 0.05 |  |  |
| 10 µm 1000 µg/L                                                                               | 0.96  | 0.06 |  |  |
|                                                                                               |       |      |  |  |

**Figure S8C: Number of neurons in the dentate gyrus for mice exposed or not to PS-MPs**

|                  | mean | SD   |  |  |
|------------------|------|------|--|--|
| Control          | 1.01 | 0.02 |  |  |
| 0.5 µm 100 µg/L  | 0.96 | 0.04 |  |  |
| 0.5 µm 1000 µg/L | 0.97 | 0.03 |  |  |
| 4 µm 100 µg/L    | 0.93 | 0.05 |  |  |
| 4 µm 1000 µg/L   | 0.94 | 0.06 |  |  |
| 10 µm 100 µg/L   | 0.97 | 0.04 |  |  |
| 10 µm 1000 µg/L  | 0.99 | 0.05 |  |  |

**Figure S9A: mRNA level of *caspase-3* in the hippocampus of mice exposed or not to PS-MPs**

| <b><i>Caspase-3/Gapdh</i> ratio</b> | mean   | SD     |  |  |
|-------------------------------------|--------|--------|--|--|
| Control                             | 0.9999 | 0.0171 |  |  |
| 0.5 µm 100 µg/L                     | 1.1327 | 0.0559 |  |  |
| 0.5 µm 1000 µg/L                    | 1.2987 | 0.1153 |  |  |
| 4 µm 100 µg/L                       | 1.1491 | 0.0267 |  |  |
| 4 µm 1000 µg/L                      | 1.3089 | 0.0838 |  |  |
| 10 µm 100 µg/L                      | 1.1281 | 0.0304 |  |  |
| 10 µm 1000 µg/L                     | 1.1773 | 0.0354 |  |  |

**Figure S9B: *Bax/Bcl-2* mRNA ratio in the hippocampus of mice exposed or not to PS-MPs**

| <b><i>Bax/Bcl-2</i> ratio</b>          | mean   | SD     |  |  |
|----------------------------------------|--------|--------|--|--|
| Control                                | 1.0003 | 0.0372 |  |  |
| 0.5 $\mu\text{m}$ 100 $\mu\text{g/L}$  | 1.8476 | 0.1304 |  |  |
| 0.5 $\mu\text{m}$ 1000 $\mu\text{g/L}$ | 1.6885 | 0.1353 |  |  |
| 4 $\mu\text{m}$ 100 $\mu\text{g/L}$    | 1.8125 | 0.2710 |  |  |
| 4 $\mu\text{m}$ 1000 $\mu\text{g/L}$   | 1.6351 | 0.0880 |  |  |
| 10 $\mu\text{m}$ 100 $\mu\text{g/L}$   | 1.6239 | 0.0967 |  |  |
| 10 $\mu\text{m}$ 1000 $\mu\text{g/L}$  | 1.6136 | 0.0880 |  |  |

**Figure S11A: Expression of *Gap43* mRNA in hippocampus of mice exposed or not to PS-MPs**

| <b><i>Gap43/Gapdh</i> ratio</b>        | mean   | SD     |  |  |
|----------------------------------------|--------|--------|--|--|
| Control                                | 1.0013 | 0.0408 |  |  |
| 0.5 $\mu\text{m}$ 100 $\mu\text{g/L}$  | 1.2930 | 0.2807 |  |  |
| 0.5 $\mu\text{m}$ 1000 $\mu\text{g/L}$ | 1.1059 | 0.0664 |  |  |
| 4 $\mu\text{m}$ 100 $\mu\text{g/L}$    | 1.3914 | 0.2779 |  |  |
| 4 $\mu\text{m}$ 1000 $\mu\text{g/L}$   | 1.2130 | 0.2703 |  |  |
| 10 $\mu\text{m}$ 100 $\mu\text{g/L}$   | 1.3225 | 0.3283 |  |  |
| 10 $\mu\text{m}$ 1000 $\mu\text{g/L}$  | 1.3995 | 0.2376 |  |  |

**Figure S11B: Expression of *syt4* mRNA in hippocampus of mice exposed or not to PS-MPs**

| <b><i>syt4/Gapdh</i> ratio</b> | mean   | SD     |  |  |
|--------------------------------|--------|--------|--|--|
| Control                        | 1.0013 | 0.0361 |  |  |

|                                        |        |        |  |  |
|----------------------------------------|--------|--------|--|--|
| 0.5 $\mu\text{m}$ 100 $\mu\text{g/L}$  | 1.3104 | 0.1811 |  |  |
| 0.5 $\mu\text{m}$ 1000 $\mu\text{g/L}$ | 1.1961 | 0.1022 |  |  |
| 4 $\mu\text{m}$ 100 $\mu\text{g/L}$    | 1.1193 | 0.0650 |  |  |
| 4 $\mu\text{m}$ 1000 $\mu\text{g/L}$   | 1.1186 | 0.0825 |  |  |
| 10 $\mu\text{m}$ 100 $\mu\text{g/L}$   | 1.0513 | 0.0765 |  |  |
| 10 $\mu\text{m}$ 1000 $\mu\text{g/L}$  | 1.0575 | 0.0550 |  |  |

**Figure S11C: Expression of *Ncam* mRNA in hippocampus of mice exposed or not to PS-MPs**

| <i>Ncam/Gapdh</i> ratio                | mean   | SD     |  |  |
|----------------------------------------|--------|--------|--|--|
| Control                                | 1.0007 | 0.0156 |  |  |
| 0.5 $\mu\text{m}$ 100 $\mu\text{g/L}$  | 1.2054 | 0.1273 |  |  |
| 0.5 $\mu\text{m}$ 1000 $\mu\text{g/L}$ | 1.0183 | 0.0461 |  |  |
| 4 $\mu\text{m}$ 100 $\mu\text{g/L}$    | 1.1795 | 0.1093 |  |  |
| 4 $\mu\text{m}$ 1000 $\mu\text{g/L}$   | 0.8776 | 0.1129 |  |  |
| 10 $\mu\text{m}$ 100 $\mu\text{g/L}$   | 0.9086 | 0.0136 |  |  |
| 10 $\mu\text{m}$ 1000 $\mu\text{g/L}$  | 0.9664 | 0.0340 |  |  |

**Figure S12B: Percent of total cells in view that were *Mcp-1* positive in the hippocampus of mice exposed or not to PS-MPs**

|                                        | mean  | SD   |  |  |
|----------------------------------------|-------|------|--|--|
| Control                                | 5.50  | 1.08 |  |  |
| 0.5 $\mu\text{m}$ 100 $\mu\text{g/L}$  | 14.67 | 2.75 |  |  |
| 0.5 $\mu\text{m}$ 1000 $\mu\text{g/L}$ | 15.30 | 2.79 |  |  |

|                                                                                                                                                   |       |      |  |  |
|---------------------------------------------------------------------------------------------------------------------------------------------------|-------|------|--|--|
| 4 $\mu\text{m}$ 100 $\mu\text{g/L}$                                                                                                               | 15.33 | 1.45 |  |  |
| 4 $\mu\text{m}$ 1000 $\mu\text{g/L}$                                                                                                              | 13.43 | 2.66 |  |  |
| 10 $\mu\text{m}$ 100 $\mu\text{g/L}$                                                                                                              | 14.57 | 2.65 |  |  |
| 10 $\mu\text{m}$ 1000 $\mu\text{g/L}$                                                                                                             | 18.43 | 1.72 |  |  |
| <b>Figure S12C: Percent of total cells in view that were TNF-<math>\alpha</math> positive in the hippocampus of mice exposed or not to PS-MPs</b> |       |      |  |  |
| <b>Figure S12C</b>                                                                                                                                | mean  | SD   |  |  |
| Control                                                                                                                                           | 4.90  | 1.14 |  |  |
| 0.5 $\mu\text{m}$ 100 $\mu\text{g/L}$                                                                                                             | 14.83 | 2.13 |  |  |
| 0.5 $\mu\text{m}$ 1000 $\mu\text{g/L}$                                                                                                            | 15.70 | 1.80 |  |  |
| 4 $\mu\text{m}$ 100 $\mu\text{g/L}$                                                                                                               | 21.20 | 3.24 |  |  |
| 4 $\mu\text{m}$ 1000 $\mu\text{g/L}$                                                                                                              | 20.03 | 2.42 |  |  |
| 10 $\mu\text{m}$ 100 $\mu\text{g/L}$                                                                                                              | 20.87 | 2.27 |  |  |
| 10 $\mu\text{m}$ 1000 $\mu\text{g/L}$                                                                                                             | 15.40 | 1.61 |  |  |

**Table S4.** *P*-values for non-statistically and statistically significant results.

| <b>Figure 4B: Time for mice (exposed or not to PS-MPs) to find the platform during learning trials (seconds)</b> |         |         |         |         |
|------------------------------------------------------------------------------------------------------------------|---------|---------|---------|---------|
|                                                                                                                  | P value | Summary | P value | Summary |
|                                                                                                                  | Day1    |         | Day 2   |         |
| Control vs 0.5 $\mu\text{m}$ 100 $\mu\text{g/L}$ PS-MPs group                                                    | 0.6127  | ns      | 0.9986  | ns      |
| Control vs 0.5 $\mu\text{m}$ 1000 $\mu\text{g/L}$ PS-MPs group                                                   | 0.3880  | ns      | 0.4518  | ns      |

|                                                                                                            |         |         |        |    |
|------------------------------------------------------------------------------------------------------------|---------|---------|--------|----|
| Control vs 4 $\mu\text{m}$ 100 $\mu\text{g/L}$ PS-MPs group                                                | 0.5606  | ns      | 0.4541 | ns |
| Control vs 4 $\mu\text{m}$ 1000 $\mu\text{g/L}$ PS-MPs group                                               | 0.6864  | ns      | 0.2371 | ns |
| Control vs 10 $\mu\text{m}$ 100 $\mu\text{g/L}$ PS-MPs group                                               | 0.8004  | ns      | 0.4523 | ns |
| Control vs 10 $\mu\text{m}$ 1000 $\mu\text{g/L}$ PS-MPs group                                              | 0.3697  | ns      | 0.3920 | ns |
|                                                                                                            | Day 3   |         | Day 4  |    |
| Control vs 0.5 $\mu\text{m}$ 100 $\mu\text{g/L}$ PS-MPs group                                              | 0.7560  | ns      | 0.4728 | ns |
| Control vs 0.5 $\mu\text{m}$ 1000 $\mu\text{g/L}$ PS-MPs group                                             | 0.9719  | ns      | 0.4530 | ns |
| Control vs 4 $\mu\text{m}$ 100 $\mu\text{g/L}$ PS-MPs group                                                | 0.6928  | ns      | 0.5764 | ns |
| Control vs 4 $\mu\text{m}$ 1000 $\mu\text{g/L}$ PS-MPs group                                               | 0.5247  | ns      | 0.2119 | ns |
| Control vs 10 $\mu\text{m}$ 100 $\mu\text{g/L}$ PS-MPs group                                               | 0.6502  | ns      | 0.5973 | ns |
| Control vs 10 $\mu\text{m}$ 1000 $\mu\text{g/L}$ PS-MPs group                                              | 0.3577  | ns      | 0.1016 | ns |
|                                                                                                            | Day 5   |         |        |    |
| Control vs 0.5 $\mu\text{m}$ 100 $\mu\text{g/L}$ PS-MPs group                                              | 0.4846  | ns      |        |    |
| Control vs 0.5 $\mu\text{m}$ 1000 $\mu\text{g/L}$ PS-MPs group                                             | 0.2593  | ns      |        |    |
| Control vs 4 $\mu\text{m}$ 100 $\mu\text{g/L}$ PS-MPs group                                                | 0.2743  | ns      |        |    |
| Control vs 4 $\mu\text{m}$ 1000 $\mu\text{g/L}$ PS-MPs group                                               | 0.0457  | *       |        |    |
| Control vs 10 $\mu\text{m}$ 100 $\mu\text{g/L}$ PS-MPs group                                               | 0.3500  | ns      |        |    |
| Control vs 10 $\mu\text{m}$ 1000 $\mu\text{g/L}$ PS-MPs group                                              | 0.0254  | *       |        |    |
| <b>Figure 4D: Number of times mice (exposed or not to PS-MPs) crossed the target platform on sixth day</b> |         |         |        |    |
|                                                                                                            | P value | Summary |        |    |
| Control vs 0.5 $\mu\text{m}$ 100 $\mu\text{g/L}$ PS-MPs group                                              | 0.0069  | **      |        |    |

|                                                                |        |    |  |  |
|----------------------------------------------------------------|--------|----|--|--|
| Control vs 0.5 $\mu\text{m}$ 1000 $\mu\text{g/L}$ PS-MPs group | 0.0031 | ** |  |  |
| Control vs 4 $\mu\text{m}$ 100 $\mu\text{g/L}$ PS-MPs group    | 0.0039 | ** |  |  |
| Control vs 4 $\mu\text{m}$ 1000 $\mu\text{g/L}$ PS-MPs group   | 0.0009 | ** |  |  |
| Control vs 10 $\mu\text{m}$ 100 $\mu\text{g/L}$ PS-MPs group   | 0.0057 | ** |  |  |
| Control vs 10 $\mu\text{m}$ 1000 $\mu\text{g/L}$ PS-MPs group  | 0.0016 | ** |  |  |

**Figure 4E: Percentage of time mice (exposed or not to PS-MPs) took in the quadrant of the target platform (sixth day)**

|                                                                | P value | Summary |  |  |
|----------------------------------------------------------------|---------|---------|--|--|
| Control vs 0.5 $\mu\text{m}$ 100 $\mu\text{g/L}$ PS-MPs group  | 0.0071  | **      |  |  |
| Control vs 0.5 $\mu\text{m}$ 1000 $\mu\text{g/L}$ PS-MPs group | 0.0035  | **      |  |  |
| Control vs 4 $\mu\text{m}$ 100 $\mu\text{g/L}$ PS-MPs group    | 0.0352  | *       |  |  |
| Control vs 4 $\mu\text{m}$ 1000 $\mu\text{g/L}$ PS-MPs group   | 0.0028  | **      |  |  |
| Control vs 10 $\mu\text{m}$ 100 $\mu\text{g/L}$ PS-MPs group   | 0.0066  | **      |  |  |
| Control vs 10 $\mu\text{m}$ 1000 $\mu\text{g/L}$ PS-MPs group  | 0.0013  | **      |  |  |

**Figure 5C: Novelty scores (time spent (s) investigating novel object/time spent (s) investigating both objects in total for mice exposed or not to PS-MPs)**

|                                                                | P value | Summary |  |  |
|----------------------------------------------------------------|---------|---------|--|--|
| Control vs 0.5 $\mu\text{m}$ 100 $\mu\text{g/L}$ PS-MPs group  | 0.0026  | **      |  |  |
| Control vs 0.5 $\mu\text{m}$ 1000 $\mu\text{g/L}$ PS-MPs group | 0.0011  | **      |  |  |
| Control vs 4 $\mu\text{m}$ 100 $\mu\text{g/L}$ PS-MPs group    | 0.0046  | **      |  |  |
| Control vs 4 $\mu\text{m}$ 1000 $\mu\text{g/L}$ PS-MPs group   | 0.0000  | **      |  |  |
| Control vs 10 $\mu\text{m}$ 100 $\mu\text{g/L}$ PS-MPs group   | 0.0021  | **      |  |  |

|                                                                                                           |         |         |  |  |
|-----------------------------------------------------------------------------------------------------------|---------|---------|--|--|
| Control vs 10 $\mu\text{m}$ 1000 $\mu\text{g/L}$ PS-MPs group                                             | 0.0001  | **      |  |  |
| <b>Figure 7B: Number of dendritic spines in hippocampus of mice exposed or not to PS-MPs</b>              |         |         |  |  |
|                                                                                                           | P value | Summary |  |  |
| Control vs 0.5 $\mu\text{m}$ 1000 $\mu\text{g/L}$ PS-MPs group                                            | 0.0001  | **      |  |  |
| Control vs 4 $\mu\text{m}$ 1000 $\mu\text{g/L}$ PS-MPs group                                              | 0.0000  | **      |  |  |
| Control vs 10 $\mu\text{m}$ 1000 $\mu\text{g/L}$ PS-MPs group                                             | 0.0001  | **      |  |  |
| <b>Figure 7C: Protein expression of synapsin 1 in the hippocampus of mice exposed or not to PS-MPs</b>    |         |         |  |  |
|                                                                                                           | P value | Summary |  |  |
| Control vs 0.5 $\mu\text{m}$ 100 $\mu\text{g/L}$ PS-MPs group                                             | 0.0168  | *       |  |  |
| Control vs 0.5 $\mu\text{m}$ 1000 $\mu\text{g/L}$ PS-MPs group                                            | 0.0002  | **      |  |  |
| Control vs 4 $\mu\text{m}$ 100 $\mu\text{g/L}$ PS-MPs group                                               | 0.0312  | *       |  |  |
| Control vs 4 $\mu\text{m}$ 1000 $\mu\text{g/L}$ PS-MPs group                                              | 0.0004  | **      |  |  |
| Control vs 10 $\mu\text{m}$ 100 $\mu\text{g/L}$ PS-MPs group                                              | 0.1427  | ns      |  |  |
| Control vs 10 $\mu\text{m}$ 1000 $\mu\text{g/L}$ PS-MPs group                                             | 0.0038  | **      |  |  |
| <b>Figure 7C: Protein expression of synaptophysin in the hippocampus of mice exposed or not to PS-MPs</b> |         |         |  |  |
|                                                                                                           | P value | Summary |  |  |
| Control vs 0.5 $\mu\text{m}$ 100 $\mu\text{g/L}$ PS-MPs group                                             | 0.0045  | **      |  |  |
| Control vs 0.5 $\mu\text{m}$ 1000 $\mu\text{g/L}$ PS-MPs group                                            | 0.0034  | **      |  |  |
| Control vs 4 $\mu\text{m}$ 100 $\mu\text{g/L}$ PS-MPs group                                               | 0.0012  | **      |  |  |
| Control vs 4 $\mu\text{m}$ 1000 $\mu\text{g/L}$ PS-MPs group                                              | 0.0002  | **      |  |  |



|                                                                                                      |         |         |  |  |
|------------------------------------------------------------------------------------------------------|---------|---------|--|--|
| Control vs 10 $\mu$ m 100 $\mu$ g/L PS-MPs group                                                     | 0.0009  | **      |  |  |
| Control vs 10 $\mu$ m 1000 $\mu$ g/L PS-MPs group                                                    | 0.0015  | **      |  |  |
| <b>Figure 7C: Protein expression of PSD95 in the hippocampus of mice exposed or not to PS-MPs</b>    |         |         |  |  |
|                                                                                                      | P value | Summary |  |  |
| Control vs 0.5 $\mu$ m 100 $\mu$ g/L PS-MPs group                                                    | 0.0099  | **      |  |  |
| Control vs 0.5 $\mu$ m 1000 $\mu$ g/L PS-MPs group                                                   | 0.0007  | **      |  |  |
| Control vs 4 $\mu$ m 100 $\mu$ g/L PS-MPs group                                                      | 0.0152  | *       |  |  |
| Control vs 4 $\mu$ m 1000 $\mu$ g/L PS-MPs group                                                     | 0.0001  | **      |  |  |
| Control vs 10 $\mu$ m 100 $\mu$ g/L PS-MPs group                                                     | 0.0777  | ns      |  |  |
| Control vs 10 $\mu$ m 1000 $\mu$ g/L PS-MPs group                                                    | 0.0425  | *       |  |  |
| <b>Figure 7D: mRNA expression of <i>Bdnf</i> in the hippocampus of mice exposed or not to PS-MPs</b> |         |         |  |  |
|                                                                                                      | P value | Summary |  |  |
| Control vs 0.5 $\mu$ m 100 $\mu$ g/L PS-MPs group                                                    | 0.0007  | **      |  |  |
| Control vs 0.5 $\mu$ m 1000 $\mu$ g/L PS-MPs group                                                   | 0.0012  | **      |  |  |
| Control vs 4 $\mu$ m 100 $\mu$ g/L PS-MPs group                                                      | 0.0056  | **      |  |  |
| Control vs 4 $\mu$ m 1000 $\mu$ g/L PS-MPs group                                                     | 0.0030  | **      |  |  |
| Control vs 10 $\mu$ m 100 $\mu$ g/L PS-MPs group                                                     | 0.0013  | **      |  |  |
| Control vs 10 $\mu$ m 1000 $\mu$ g/L PS-MPs group                                                    | 0.0009  | **      |  |  |
| <b>Figure 7E: mRNA expression of <i>syt1</i> in the hippocampus of mice exposed or not to PS-MPs</b> |         |         |  |  |

|                                                                | P value | Summary |  |  |
|----------------------------------------------------------------|---------|---------|--|--|
| Control vs 0.5 $\mu\text{m}$ 100 $\mu\text{g/L}$ PS-MPs group  | 0.0043  | **      |  |  |
| Control vs 0.5 $\mu\text{m}$ 1000 $\mu\text{g/L}$ PS-MPs group | 0.0238  | *       |  |  |
| Control vs 4 $\mu\text{m}$ 100 $\mu\text{g/L}$ PS-MPs group    | 0.1363  | ns      |  |  |
| Control vs 4 $\mu\text{m}$ 1000 $\mu\text{g/L}$ PS-MPs group   | 0.0016  | **      |  |  |
| Control vs 10 $\mu\text{m}$ 100 $\mu\text{g/L}$ PS-MPs group   | 0.0038  | **      |  |  |
| Control vs 10 $\mu\text{m}$ 1000 $\mu\text{g/L}$ PS-MPs group  | 0.0087  | **      |  |  |

**Figure 8: Expression various inflammation-related mRNAs in the hippocampus of mice exposed or not to PS-MPs**

| <i>Tnf-<math>\alpha</math></i>                                 | P value | Summary |  |  |
|----------------------------------------------------------------|---------|---------|--|--|
| Control vs 0.5 $\mu\text{m}$ 100 $\mu\text{g/L}$ PS-MPs group  | 0.0104  | *       |  |  |
| Control vs 0.5 $\mu\text{m}$ 1000 $\mu\text{g/L}$ PS-MPs group | 0.0007  | **      |  |  |
| Control vs 4 $\mu\text{m}$ 100 $\mu\text{g/L}$ PS-MPs group    | 0.0012  | **      |  |  |
| Control vs 4 $\mu\text{m}$ 1000 $\mu\text{g/L}$ PS-MPs group   | 0.0002  | **      |  |  |
| Control vs 10 $\mu\text{m}$ 100 $\mu\text{g/L}$ PS-MPs group   | 0.0040  | **      |  |  |
| Control vs 10 $\mu\text{m}$ 1000 $\mu\text{g/L}$ PS-MPs group  | 0.0000  | **      |  |  |

| <i>Mcp-1</i>                                                   | P value | Summary |  |  |
|----------------------------------------------------------------|---------|---------|--|--|
| Control vs 0.5 $\mu\text{m}$ 100 $\mu\text{g/L}$ PS-MPs group  | 0.0111  | *       |  |  |
| Control vs 0.5 $\mu\text{m}$ 1000 $\mu\text{g/L}$ PS-MPs group | 0.0172  | *       |  |  |
| Control vs 4 $\mu\text{m}$ 100 $\mu\text{g/L}$ PS-MPs group    | 0.0040  | **      |  |  |
| Control vs 4 $\mu\text{m}$ 1000 $\mu\text{g/L}$ PS-MPs group   | 0.0091  | **      |  |  |

|                                                    |         |         |  |  |
|----------------------------------------------------|---------|---------|--|--|
| Control vs 10 $\mu$ m 100 $\mu$ g/L PS-MPs group   | 0.0089  | **      |  |  |
| Control vs 10 $\mu$ m 1000 $\mu$ g/L PS-MPs group  | 0.0007  | **      |  |  |
|                                                    |         |         |  |  |
| <b><i>Il-6</i></b>                                 | P value | Summary |  |  |
| Control vs 0.5 $\mu$ m 100 $\mu$ g/L PS-MPs group  | 0.0179  | *       |  |  |
| Control vs 0.5 $\mu$ m 1000 $\mu$ g/L PS-MPs group | 0.0015  | **      |  |  |
| Control vs 4 $\mu$ m 100 $\mu$ g/L PS-MPs group    | 0.0012  | **      |  |  |
| Control vs 4 $\mu$ m 1000 $\mu$ g/L PS-MPs group   | 0.0008  | **      |  |  |
| Control vs 10 $\mu$ m 100 $\mu$ g/L PS-MPs group   | 0.0173  | *       |  |  |
| Control vs 10 $\mu$ m 1000 $\mu$ g/L PS-MPs group  | 0.1801  | ns      |  |  |
|                                                    |         |         |  |  |
| <b><i>Il-1<math>\beta</math></i></b>               | P value | Summary |  |  |
| Control vs 0.5 $\mu$ m 100 $\mu$ g/L PS-MPs group  | 0.0022  | **      |  |  |
| Control vs 0.5 $\mu$ m 1000 $\mu$ g/L PS-MPs group | 0.0321  | *       |  |  |
| Control vs 4 $\mu$ m 100 $\mu$ g/L PS-MPs group    | 0.0144  | *       |  |  |
| Control vs 4 $\mu$ m 1000 $\mu$ g/L PS-MPs group   | 0.0084  | **      |  |  |
| Control vs 10 $\mu$ m 100 $\mu$ g/L PS-MPs group   | 0.0133  | *       |  |  |
| Control vs 10 $\mu$ m 1000 $\mu$ g/L PS-MPs group  | 0.0016  | **      |  |  |
|                                                    |         |         |  |  |
| <b><i>Cxcl10</i></b>                               | P value | Summary |  |  |
| Control vs 0.5 $\mu$ m 100 $\mu$ g/L PS-MPs group  | 0.0022  | **      |  |  |
| Control vs 0.5 $\mu$ m 1000 $\mu$ g/L PS-MPs group | 0.0174  | *       |  |  |

|                                                                                                                         |         |         |         |         |
|-------------------------------------------------------------------------------------------------------------------------|---------|---------|---------|---------|
| Control vs 4 $\mu\text{m}$ 100 $\mu\text{g/L}$ PS-MPs group                                                             | 0.0000  | **      |         |         |
| Control vs 4 $\mu\text{m}$ 1000 $\mu\text{g/L}$ PS-MPs group                                                            | 0.0043  | **      |         |         |
| Control vs 10 $\mu\text{m}$ 100 $\mu\text{g/L}$ PS-MPs group                                                            | 0.0019  | **      |         |         |
| Control vs 10 $\mu\text{m}$ 1000 $\mu\text{g/L}$ PS-MPs group                                                           | 0.0097  | **      |         |         |
| <b>Figure S4: Average swim speed (mm/s) on days 1-5 in the Morris water maze test for mice exposed or not to PS-MPs</b> |         |         |         |         |
|                                                                                                                         | P value | Summary | P value | Summary |
|                                                                                                                         | Day 1   |         | Day 2   |         |
| Control vs 0.5 $\mu\text{m}$ 100 $\mu\text{g/L}$ PS-MPs group                                                           | 0.0853  | ns      | 0.3790  | ns      |
| Control vs 0.5 $\mu\text{m}$ 1000 $\mu\text{g/L}$ PS-MPs group                                                          | 0.0512  | ns      | 0.5696  | ns      |
| Control vs 4 $\mu\text{m}$ 100 $\mu\text{g/L}$ PS-MPs group                                                             | 0.1107  | ns      | 0.1967  | ns      |
| Control vs 4 $\mu\text{m}$ 1000 $\mu\text{g/L}$ PS-MPs group                                                            | 0.1674  | ns      | 0.1223  | ns      |
| Control vs 10 $\mu\text{m}$ 100 $\mu\text{g/L}$ PS-MPs group                                                            | 0.0584  | ns      | 0.5439  | ns      |
| Control vs 10 $\mu\text{m}$ 1000 $\mu\text{g/L}$ PS-MPs group                                                           | 0.9004  | ns      | 0.5270  | ns      |
|                                                                                                                         | Day 3   |         | Day 4   |         |
| Control vs 0.5 $\mu\text{m}$ 100 $\mu\text{g/L}$ PS-MPs group                                                           | 0.0858  | ns      | 0.9848  | ns      |
| Control vs 0.5 $\mu\text{m}$ 1000 $\mu\text{g/L}$ PS-MPs group                                                          | 0.4306  | ns      | 0.4103  | ns      |
| Control vs 4 $\mu\text{m}$ 100 $\mu\text{g/L}$ PS-MPs group                                                             | 0.5860  | ns      | 0.7105  | ns      |
| Control vs 4 $\mu\text{m}$ 1000 $\mu\text{g/L}$ PS-MPs group                                                            | 0.5346  | ns      | 0.3320  | ns      |
| Control vs 10 $\mu\text{m}$ 100 $\mu\text{g/L}$ PS-MPs group                                                            | 0.1255  | ns      | 0.8036  | ns      |
| Control vs 10 $\mu\text{m}$ 1000 $\mu\text{g/L}$ PS-MPs group                                                           | 0.1734  | ns      | 0.1491  | ns      |
|                                                                                                                         | Day 5   |         |         |         |

|                                                                                                                                             |         |         |         |         |
|---------------------------------------------------------------------------------------------------------------------------------------------|---------|---------|---------|---------|
| Control vs 0.5 $\mu\text{m}$ 100 $\mu\text{g/L}$ PS-MPs group                                                                               | 0.3632  | ns      |         |         |
| Control vs 0.5 $\mu\text{m}$ 1000 $\mu\text{g/L}$ PS-MPs group                                                                              | 0.7552  | ns      |         |         |
| Control vs 4 $\mu\text{m}$ 100 $\mu\text{g/L}$ PS-MPs group                                                                                 | 0.4222  | ns      |         |         |
| Control vs 4 $\mu\text{m}$ 1000 $\mu\text{g/L}$ PS-MPs group                                                                                | 0.3570  | ns      |         |         |
| Control vs 10 $\mu\text{m}$ 100 $\mu\text{g/L}$ PS-MPs group                                                                                | 0.0851  | ns      |         |         |
| Control vs 10 $\mu\text{m}$ 1000 $\mu\text{g/L}$ PS-MPs group                                                                               | 0.5563  | ns      |         |         |
| <b>Figure S5: Total path length to find the hidden platform (mm) of mice exposed or not to PS-MPs on days 1-5 in Morris water maze test</b> |         |         |         |         |
|                                                                                                                                             | P value | Summary | P value | Summary |
| <b>Figure S5</b>                                                                                                                            | Day 1   |         | Day 2   |         |
| Control vs 0.5 $\mu\text{m}$ 100 $\mu\text{g/L}$ PS-MPs group                                                                               | 0.4543  | ns      | 0.8801  | ns      |
| Control vs 0.5 $\mu\text{m}$ 1000 $\mu\text{g/L}$ PS-MPs group                                                                              | 0.7451  | ns      | 0.4559  | ns      |
| Control vs 4 $\mu\text{m}$ 100 $\mu\text{g/L}$ PS-MPs group                                                                                 | 0.5164  | ns      | 0.3508  | ns      |
| Control vs 4 $\mu\text{m}$ 1000 $\mu\text{g/L}$ PS-MPs group                                                                                | 0.2275  | ns      | 0.0780  | ns      |
| Control vs 10 $\mu\text{m}$ 100 $\mu\text{g/L}$ PS-MPs group                                                                                | 0.2967  | ns      | 0.4938  | ns      |
| Control vs 10 $\mu\text{m}$ 1000 $\mu\text{g/L}$ PS-MPs group                                                                               | 0.7869  | ns      | 0.7011  | ns      |
|                                                                                                                                             | Day 3   |         | Day 4   |         |
| Control vs 0.5 $\mu\text{m}$ 100 $\mu\text{g/L}$ PS-MPs group                                                                               | 0.1557  | ns      | 0.4011  | ns      |
| Control vs 0.5 $\mu\text{m}$ 1000 $\mu\text{g/L}$ PS-MPs group                                                                              | 0.6255  | ns      | 0.7623  | ns      |
| Control vs 4 $\mu\text{m}$ 100 $\mu\text{g/L}$ PS-MPs group                                                                                 | 0.7281  | ns      | 0.8126  | ns      |
| Control vs 4 $\mu\text{m}$ 1000 $\mu\text{g/L}$ PS-MPs group                                                                                | 0.6115  | ns      | 0.7129  | ns      |
| Control vs 10 $\mu\text{m}$ 100 $\mu\text{g/L}$ PS-MPs group                                                                                | 0.3131  | ns      | 0.7357  | ns      |

|                                                                |        |    |        |    |
|----------------------------------------------------------------|--------|----|--------|----|
| Control vs 10 $\mu\text{m}$ 1000 $\mu\text{g/L}$ PS-MPs group  | 0.5729 | ns | 0.9928 | ns |
|                                                                | Day 5  |    |        |    |
| Control vs 0.5 $\mu\text{m}$ 100 $\mu\text{g/L}$ PS-MPs group  | 0.3137 | ns |        |    |
| Control vs 0.5 $\mu\text{m}$ 1000 $\mu\text{g/L}$ PS-MPs group | 0.5187 | ns |        |    |
| Control vs 4 $\mu\text{m}$ 100 $\mu\text{g/L}$ PS-MPs group    | 0.2083 | ns |        |    |
| Control vs 4 $\mu\text{m}$ 1000 $\mu\text{g/L}$ PS-MPs group   | 0.0413 | *  |        |    |
| Control vs 10 $\mu\text{m}$ 100 $\mu\text{g/L}$ PS-MPs group   | 0.1378 | ns |        |    |
| Control vs 10 $\mu\text{m}$ 1000 $\mu\text{g/L}$ PS-MPs group  | 0.4982 | ns |        |    |

**Figure S6A: The recognition scores (time spent (s) investigating one object/time spent (s) investigating both objects in total) of mice exposed or not to PS-MPs on day 1**

|                                                                | P value | Summary |  |  |
|----------------------------------------------------------------|---------|---------|--|--|
| Control vs 0.5 $\mu\text{m}$ 100 $\mu\text{g/L}$ PS-MPs group  | 0.3473  | ns      |  |  |
| Control vs 0.5 $\mu\text{m}$ 1000 $\mu\text{g/L}$ PS-MPs group | 0.9779  | ns      |  |  |
| Control vs 4 $\mu\text{m}$ 100 $\mu\text{g/L}$ PS-MPs group    | 0.5071  | ns      |  |  |
| Control vs 4 $\mu\text{m}$ 1000 $\mu\text{g/L}$ PS-MPs group   | 0.2017  | ns      |  |  |
| Control vs 10 $\mu\text{m}$ 100 $\mu\text{g/L}$ PS-MPs group   | 0.1485  | ns      |  |  |
| Control vs 10 $\mu\text{m}$ 1000 $\mu\text{g/L}$ PS-MPs group  | 0.4350  | ns      |  |  |

**Figure S6B: The recognition scores (time spent (s) investigating one object/time spent (s) investigating both objects in total) of mice exposed or not to PS-MPs on day 2**

|                                                                | P value | Summary |  |  |
|----------------------------------------------------------------|---------|---------|--|--|
| Control vs 0.5 $\mu\text{m}$ 100 $\mu\text{g/L}$ PS-MPs group  | 0.5867  | ns      |  |  |
| Control vs 0.5 $\mu\text{m}$ 1000 $\mu\text{g/L}$ PS-MPs group | 0.4449  | ns      |  |  |

|                                                               |        |    |  |  |
|---------------------------------------------------------------|--------|----|--|--|
| Control vs 4 $\mu\text{m}$ 100 $\mu\text{g/L}$ PS-MPs group   | 0.5676 | ns |  |  |
| Control vs 4 $\mu\text{m}$ 1000 $\mu\text{g/L}$ PS-MPs group  | 0.9157 | ns |  |  |
| Control vs 10 $\mu\text{m}$ 100 $\mu\text{g/L}$ PS-MPs group  | 0.9893 | ns |  |  |
| Control vs 10 $\mu\text{m}$ 1000 $\mu\text{g/L}$ PS-MPs group | 0.3454 | ns |  |  |

**Figure S7A: The total distance moved (m) for mice (exposed or not to PS-MPs) in the novel object recognition testing day (day 3)**

|                                                                | P value | Summary |  |  |
|----------------------------------------------------------------|---------|---------|--|--|
| Control vs 0.5 $\mu\text{m}$ 100 $\mu\text{g/L}$ PS-MPs group  | 0.6502  | ns      |  |  |
| Control vs 0.5 $\mu\text{m}$ 1000 $\mu\text{g/L}$ PS-MPs group | 0.8094  | ns      |  |  |
| Control vs 4 $\mu\text{m}$ 100 $\mu\text{g/L}$ PS-MPs group    | 0.8052  | ns      |  |  |
| Control vs 4 $\mu\text{m}$ 1000 $\mu\text{g/L}$ PS-MPs group   | 0.2210  | ns      |  |  |
| Control vs 10 $\mu\text{m}$ 100 $\mu\text{g/L}$ PS-MPs group   | 0.4001  | ns      |  |  |
| Control vs 10 $\mu\text{m}$ 1000 $\mu\text{g/L}$ PS-MPs group  | 0.0188  | *       |  |  |

**Figure S7B: The average movement speed (mm/s) for mice (exposed or not to PS-MPs) in the novel object recognition testing day (day 3)**

|                                                                | P value | Summary |  |  |
|----------------------------------------------------------------|---------|---------|--|--|
| Control vs 0.5 $\mu\text{m}$ 100 $\mu\text{g/L}$ PS-MPs group  | 0.6505  | ns      |  |  |
| Control vs 0.5 $\mu\text{m}$ 1000 $\mu\text{g/L}$ PS-MPs group | 0.8090  | ns      |  |  |
| Control vs 4 $\mu\text{m}$ 100 $\mu\text{g/L}$ PS-MPs group    | 0.9811  | ns      |  |  |
| Control vs 4 $\mu\text{m}$ 1000 $\mu\text{g/L}$ PS-MPs group   | 0.8047  | ns      |  |  |
| Control vs 10 $\mu\text{m}$ 100 $\mu\text{g/L}$ PS-MPs group   | 0.8165  | ns      |  |  |
| Control vs 10 $\mu\text{m}$ 1000 $\mu\text{g/L}$ PS-MPs group  | 0.0188  | *       |  |  |

**Figure S8A: Number of neurons in the hippocampal CA1 for mice exposed or not to PS-MPs**

|                                                                | P value | Summary |  |  |
|----------------------------------------------------------------|---------|---------|--|--|
| Control vs 0.5 $\mu\text{m}$ 100 $\mu\text{g/L}$ PS-MPs group  | 0.5243  | ns      |  |  |
| Control vs 0.5 $\mu\text{m}$ 1000 $\mu\text{g/L}$ PS-MPs group | 0.1837  | ns      |  |  |
| Control vs 4 $\mu\text{m}$ 100 $\mu\text{g/L}$ PS-MPs group    | 0.0810  | ns      |  |  |
| Control vs 4 $\mu\text{m}$ 1000 $\mu\text{g/L}$ PS-MPs group   | 0.1404  | ns      |  |  |
| Control vs 10 $\mu\text{m}$ 100 $\mu\text{g/L}$ PS-MPs group   | 0.3345  | ns      |  |  |
| Control vs 10 $\mu\text{m}$ 1000 $\mu\text{g/L}$ PS-MPs group  | 0.5133  | ns      |  |  |

**Figure S8B: Number of neurons in the hippocampal CA3 for mice exposed or not to PS-MPs**

|                                                                | P value | Summary |  |  |
|----------------------------------------------------------------|---------|---------|--|--|
| Control vs 0.5 $\mu\text{m}$ 100 $\mu\text{g/L}$ PS-MPs group  | 0.1137  | ns      |  |  |
| Control vs 0.5 $\mu\text{m}$ 1000 $\mu\text{g/L}$ PS-MPs group | 0.1109  | ns      |  |  |
| Control vs 4 $\mu\text{m}$ 100 $\mu\text{g/L}$ PS-MPs group    | 0.0887  | ns      |  |  |
| Control vs 4 $\mu\text{m}$ 1000 $\mu\text{g/L}$ PS-MPs group   | 0.3072  | ns      |  |  |
| Control vs 10 $\mu\text{m}$ 100 $\mu\text{g/L}$ PS-MPs group   | 0.1756  | ns      |  |  |
| Control vs 10 $\mu\text{m}$ 1000 $\mu\text{g/L}$ PS-MPs group  | 0.1308  | ns      |  |  |

**Figure S8C: Number of neurons in the dentate gyrus for mice exposed or not to PS-MPs**

|                                                                | P value | Summary |  |  |
|----------------------------------------------------------------|---------|---------|--|--|
| Control vs 0.5 $\mu\text{m}$ 100 $\mu\text{g/L}$ PS-MPs group  | 0.0527  | ns      |  |  |
| Control vs 0.5 $\mu\text{m}$ 1000 $\mu\text{g/L}$ PS-MPs group | 0.0461  | *       |  |  |



|                                                               |        |    |  |  |
|---------------------------------------------------------------|--------|----|--|--|
| Control vs 4 $\mu\text{m}$ 100 $\mu\text{g/L}$ PS-MPs group   | 0.0313 | *  |  |  |
| Control vs 4 $\mu\text{m}$ 1000 $\mu\text{g/L}$ PS-MPs group  | 0.0819 | ns |  |  |
| Control vs 10 $\mu\text{m}$ 100 $\mu\text{g/L}$ PS-MPs group  | 0.1050 | ns |  |  |
| Control vs 10 $\mu\text{m}$ 1000 $\mu\text{g/L}$ PS-MPs group | 0.5691 | ns |  |  |

**Figure S9A: mRNA level of *caspase-3* in the hippocampus of mice exposed or not to PS-MPs**

|                                                                | P value | Summary |  |  |
|----------------------------------------------------------------|---------|---------|--|--|
| Control vs 0.5 $\mu\text{m}$ 100 $\mu\text{g/L}$ PS-MPs group  | 0.0326  | *       |  |  |
| Control vs 0.5 $\mu\text{m}$ 1000 $\mu\text{g/L}$ PS-MPs group | 0.0223  | *       |  |  |
| Control vs 4 $\mu\text{m}$ 100 $\mu\text{g/L}$ PS-MPs group    | 0.0027  | **      |  |  |
| Control vs 4 $\mu\text{m}$ 1000 $\mu\text{g/L}$ PS-MPs group   | 0.0069  | **      |  |  |
| Control vs 10 $\mu\text{m}$ 100 $\mu\text{g/L}$ PS-MPs group   | 0.0065  | **      |  |  |
| Control vs 10 $\mu\text{m}$ 1000 $\mu\text{g/L}$ PS-MPs group  | 0.0031  | **      |  |  |

**Figure S9B: *Bax/Bcl-2* mRNA ratio in the hippocampus of mice exposed or not to PS-MPs**

|                                                                | P value | Summary |  |  |
|----------------------------------------------------------------|---------|---------|--|--|
| Control vs 0.5 $\mu\text{m}$ 100 $\mu\text{g/L}$ PS-MPs group  | 0.0009  | **      |  |  |
| Control vs 0.5 $\mu\text{m}$ 1000 $\mu\text{g/L}$ PS-MPs group | 0.0023  | **      |  |  |
| Control vs 4 $\mu\text{m}$ 100 $\mu\text{g/L}$ PS-MPs group    | 0.0137  | *       |  |  |
| Control vs 4 $\mu\text{m}$ 1000 $\mu\text{g/L}$ PS-MPs group   | 0.0007  | **      |  |  |
| Control vs 10 $\mu\text{m}$ 100 $\mu\text{g/L}$ PS-MPs group   | 0.0010  | **      |  |  |
| Control vs 10 $\mu\text{m}$ 1000 $\mu\text{g/L}$ PS-MPs group  | 0.0008  | **      |  |  |

**Figure S11A: Expression of *Gap43* mRNA in hippocampus of mice exposed or not to PS-MPs**

|                                                    | P value | Summary |  |  |
|----------------------------------------------------|---------|---------|--|--|
| Control vs 0.5 $\mu$ m 100 $\mu$ g/L PS-MPs group  | 0.2195  | ns      |  |  |
| Control vs 0.5 $\mu$ m 1000 $\mu$ g/L PS-MPs group | 0.1306  | ns      |  |  |
| Control vs 4 $\mu$ m 100 $\mu$ g/L PS-MPs group    | 0.1210  | ns      |  |  |
| Control vs 4 $\mu$ m 1000 $\mu$ g/L PS-MPs group   | 0.3349  | ns      |  |  |
| Control vs 10 $\mu$ m 100 $\mu$ g/L PS-MPs group   | 0.2416  | ns      |  |  |
| Control vs 10 $\mu$ m 1000 $\mu$ g/L PS-MPs group  | 0.0798  | ns      |  |  |

**Figure S11B: Expression of *syt4* mRNA in hippocampus of mice exposed or not to PS-MPs**

|                                                    | P value | Summary |  |  |
|----------------------------------------------------|---------|---------|--|--|
| Control vs 0.5 $\mu$ m 100 $\mu$ g/L PS-MPs group  | 0.0770  | ns      |  |  |
| Control vs 0.5 $\mu$ m 1000 $\mu$ g/L PS-MPs group | 0.0638  | ns      |  |  |
| Control vs 4 $\mu$ m 100 $\mu$ g/L PS-MPs group    | 0.0882  | ns      |  |  |
| Control vs 4 $\mu$ m 1000 $\mu$ g/L PS-MPs group   | 0.1392  | ns      |  |  |
| Control vs 10 $\mu$ m 100 $\mu$ g/L PS-MPs group   | 0.4501  | ns      |  |  |
| Control vs 10 $\mu$ m 1000 $\mu$ g/L PS-MPs group  | 0.2932  | ns      |  |  |

**Figure S11C: Expression of *Ncam* mRNA in hippocampus of mice exposed or not to PS-MPs**

|                                                    | P value | Summary |  |  |
|----------------------------------------------------|---------|---------|--|--|
| Control vs 0.5 $\mu$ m 100 $\mu$ g/L PS-MPs group  | 0.0869  | ns      |  |  |
| Control vs 0.5 $\mu$ m 1000 $\mu$ g/L PS-MPs group | 0.6351  | ns      |  |  |

|                                                               |        |    |  |  |
|---------------------------------------------------------------|--------|----|--|--|
| Control vs 4 $\mu\text{m}$ 100 $\mu\text{g/L}$ PS-MPs group   | 0.0839 | ns |  |  |
| Control vs 4 $\mu\text{m}$ 1000 $\mu\text{g/L}$ PS-MPs group  | 0.2013 | ns |  |  |
| Control vs 10 $\mu\text{m}$ 100 $\mu\text{g/L}$ PS-MPs group  | 0.0033 | ** |  |  |
| Control vs 10 $\mu\text{m}$ 1000 $\mu\text{g/L}$ PS-MPs group | 0.2646 | ns |  |  |

**Figure S12B: Percent of total cells in view that were *Mcp-1* positive in the hippocampus of mice exposed or not to PS-MPs**

|                                                                | P value | Summary |  |  |
|----------------------------------------------------------------|---------|---------|--|--|
| Control vs 0.5 $\mu\text{m}$ 100 $\mu\text{g/L}$ PS-MPs group  | 0.0118  | *       |  |  |
| Control vs 0.5 $\mu\text{m}$ 1000 $\mu\text{g/L}$ PS-MPs group | 0.0098  | **      |  |  |
| Control vs 4 $\mu\text{m}$ 100 $\mu\text{g/L}$ PS-MPs group    | 0.0015  | **      |  |  |
| Control vs 4 $\mu\text{m}$ 1000 $\mu\text{g/L}$ PS-MPs group   | 0.0174  | *       |  |  |
| Control vs 10 $\mu\text{m}$ 100 $\mu\text{g/L}$ PS-MPs group   | 0.0110  | *       |  |  |
| Control vs 10 $\mu\text{m}$ 1000 $\mu\text{g/L}$ PS-MPs group  | 0.0008  | **      |  |  |

**Figure S12C: Percent of total cells in view that were *TNF- $\alpha$*  positive in the hippocampus of mice exposed or not to PS-MPs**

|                                                                | P value | Summary |  |  |
|----------------------------------------------------------------|---------|---------|--|--|
| Control vs 0.5 $\mu\text{m}$ 100 $\mu\text{g/L}$ PS-MPs group  | 0.0044  | **      |  |  |
| Control vs 0.5 $\mu\text{m}$ 1000 $\mu\text{g/L}$ PS-MPs group | 0.0020  | **      |  |  |
| Control vs 4 $\mu\text{m}$ 100 $\mu\text{g/L}$ PS-MPs group    | 0.0026  | **      |  |  |
| Control vs 4 $\mu\text{m}$ 1000 $\mu\text{g/L}$ PS-MPs group   | 0.0013  | **      |  |  |
| Control vs 10 $\mu\text{m}$ 100 $\mu\text{g/L}$ PS-MPs group   | 0.0009  | **      |  |  |
| Control vs 10 $\mu\text{m}$ 1000 $\mu\text{g/L}$ PS-MPs group  | 0.0017  | **      |  |  |

**Table S5.** Thigmotaxis of mice in Morris water maze test. Thigmotaxis is defined as mice were swimming in the outer 10% close to walls, which means mice swim almost exclusively in the periphery. The rate of thigmotaxis was expressed as the ratio of the number of mice showing thigmotaxis to the total number of mice according to the swim path trajectories.

|                  | Trials | Day 1     | Day 2     | Day 3     | Day 4     | Day 5     | Day 6    |
|------------------|--------|-----------|-----------|-----------|-----------|-----------|----------|
| Control          | 40     | 9 (22.5%) | 8 (20%)   | 7 (17.5%) | 5 (12.5%) | 4 (10%)   | 4 (10%)  |
| 100 µg/L 0.5 µm  | 40     | 8 (20%)   | 7 (17.5%) | 7 (17.5%) | 6 (15%)   | 4 (10%)   | 4 (10%)  |
| 1000 µg/L 0.5 µm | 40     | 9 (22.5%) | 8 (20%)   | 8 (20%)   | 6 (15%)   | 5 (12.5%) | 3 (7.5%) |
| 100 µg/L 4 µm    | 40     | 8 (20%)   | 8 (20%)   | 7 (17.5%) | 5 (12.5%) | 5 (12.5%) | 4 (10%)  |
| 1000 µg/L 4 µm   | 40     | 8 (20%)   | 8 (20%)   | 6 (15%)   | 6 (15%)   | 4 (10%)   | 4 (10%)  |
| 100 µg/L 10 µm   | 40     | 8 (20%)   | 8 (20%)   | 7 (17.5%) | 7 (17.5%) | 6 (15%)   | 3 (7.5%) |
| 1000 µg/L 10 µm  | 40     | 9 (22.5%) | 8 (20%)   | 7 (17.5%) | 7 (17.5%) | 6 (15%)   | 4 (10%)  |

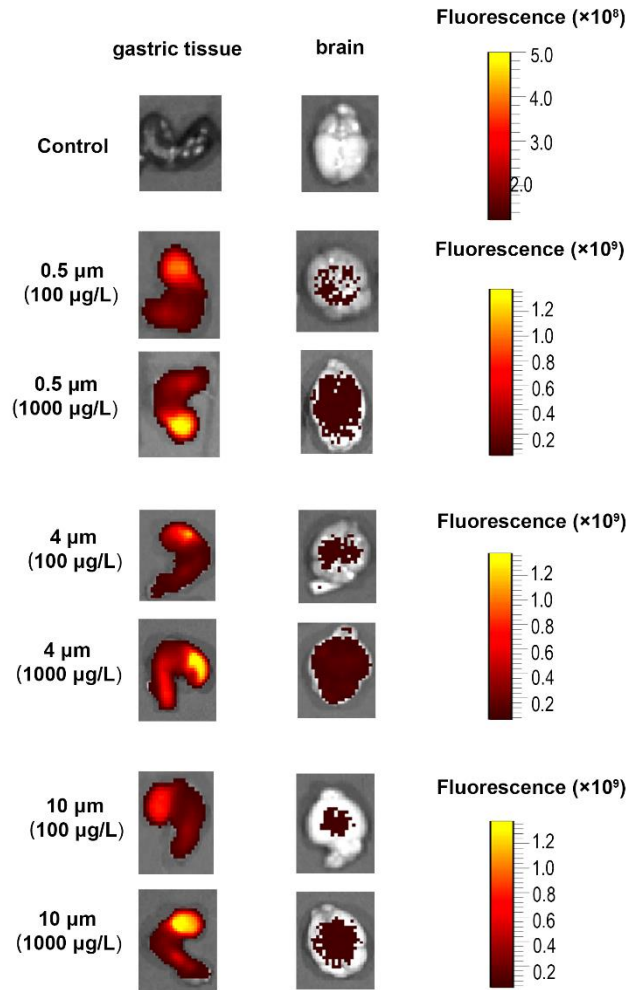

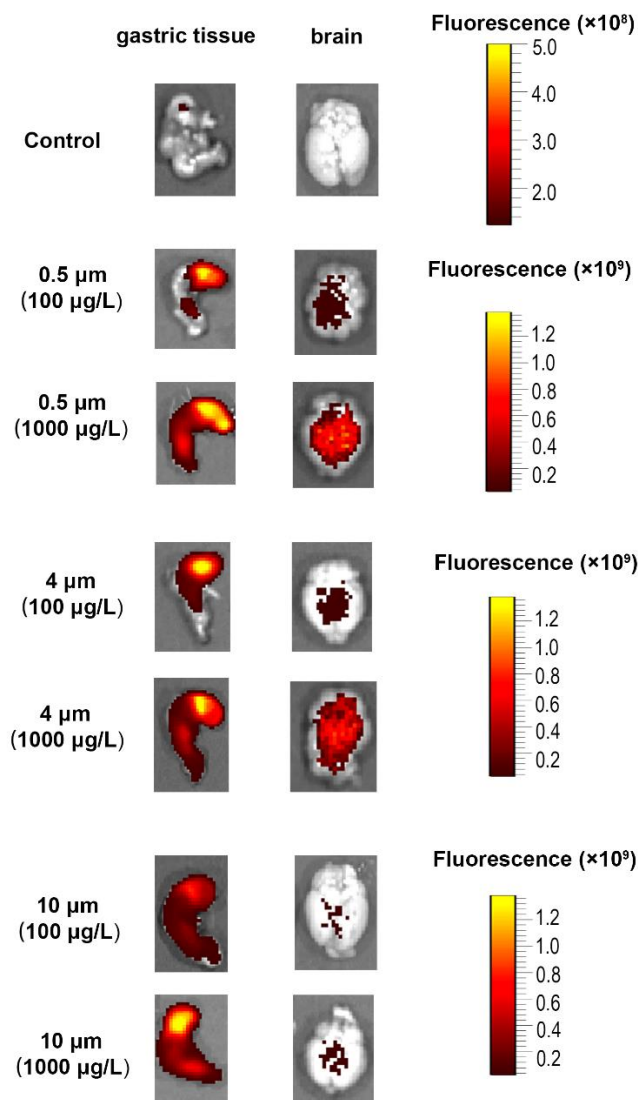

**Figure S1.** Biodistribution of various diameters of polystyrene MPs (PS-MPs) in different tissues of mice. Mice were provided drinking water containing three sizes of fluorescent PS-MPs for 180 consecutive days. Fluorescence pictures of excised brain tissues and gastric tissues were detected. The colors in pictures indicated that fluorescence PS-MPs in tissues.

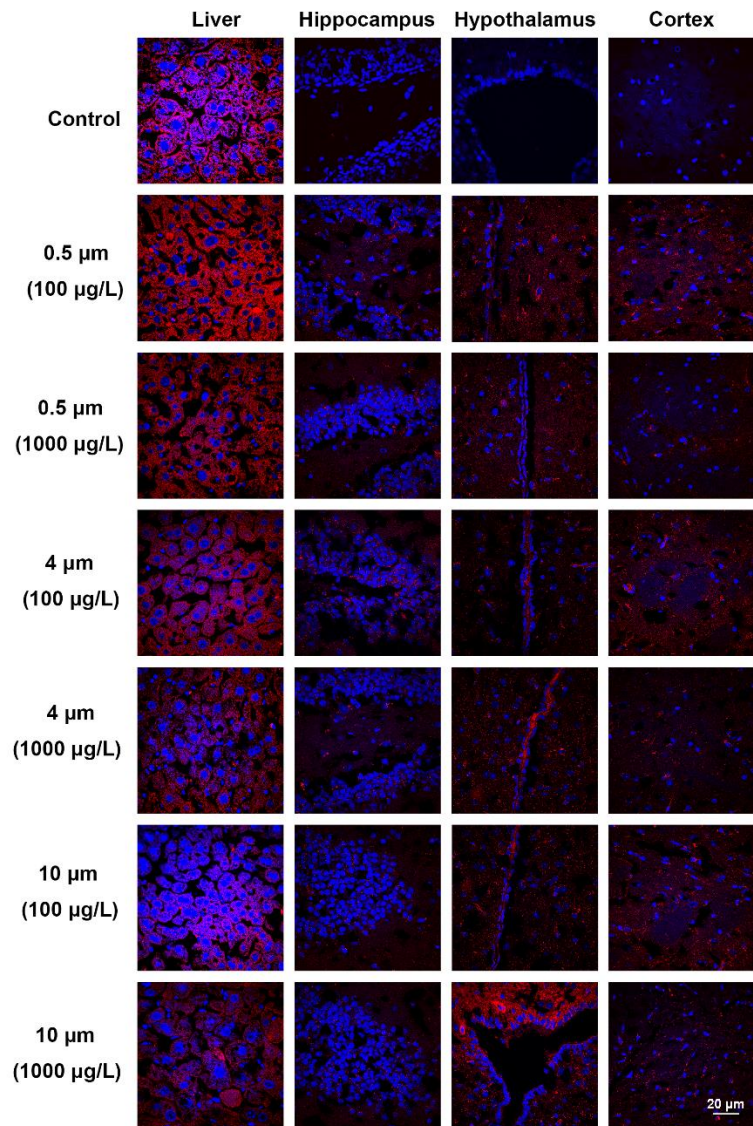

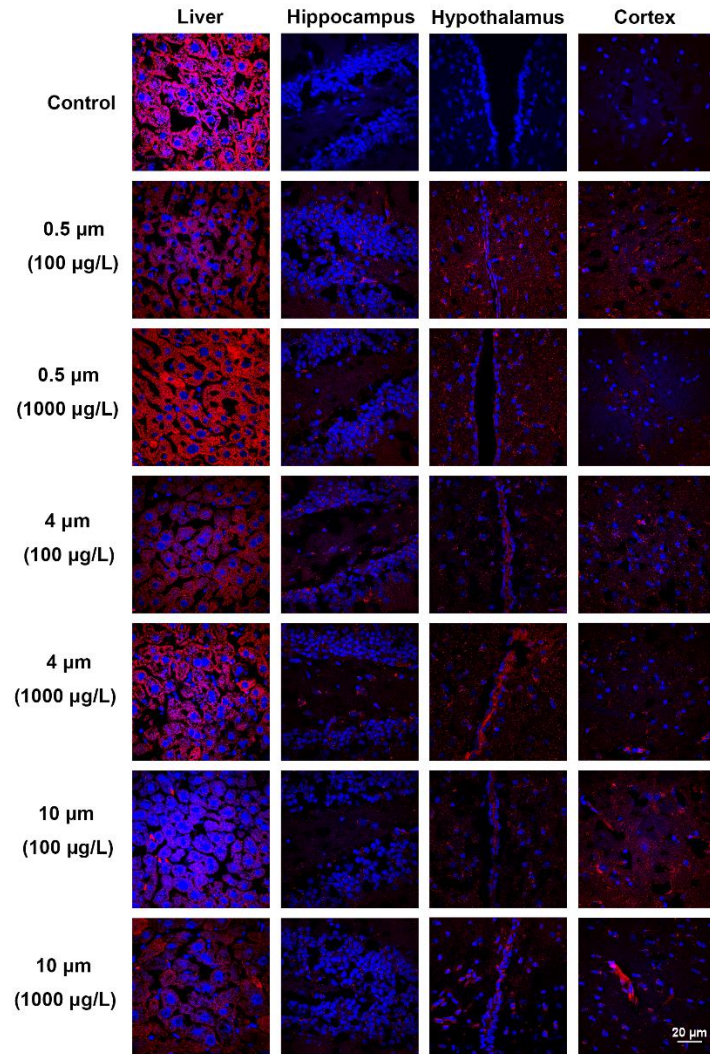

**Figure S2.** BBB integrity was detected by biotin tracer experiments. The sections were stained with biotin (red) and DAPI (blue). The existence of biotin in brain tissues was examined by immunofluorescence microscopy. The biotin signal of the liver parenchyma was used as a positive control (scale bar = 20  $\mu\text{m}$ ).



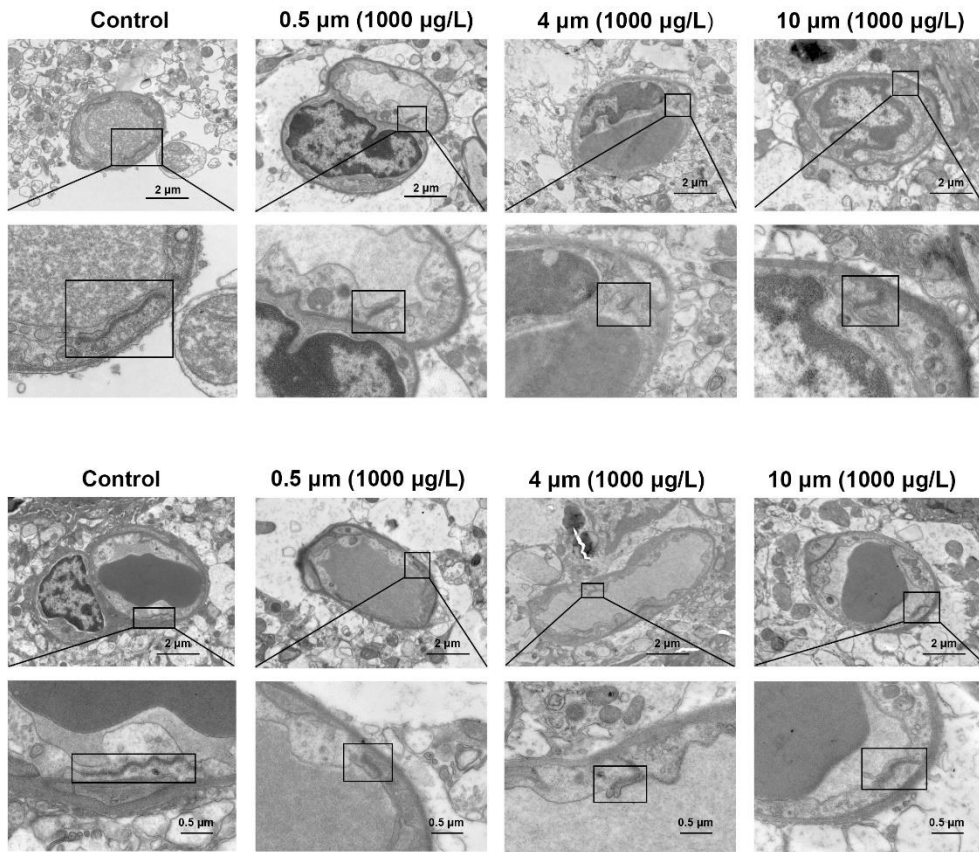

**Figure S3.** Ultrastructure of BBB in PS-MP-exposed and unexposed mice as detected by an electron microscope. Upper images displayed the ultrastructure of BBB. Lower images referred to magnified boxed areas.

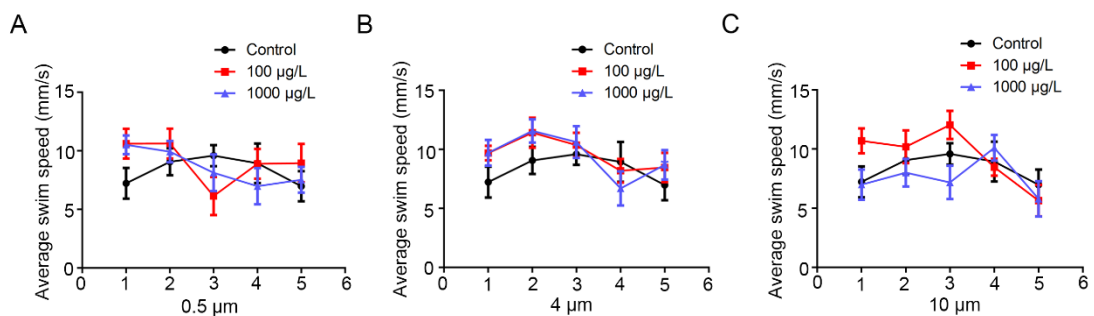

**Figure S4.** The average swim speed of mice on days 1-5 in Morris water maze test is shown. Circle (Control), square (100 μg/L), triangle (1000 μg/L). (A) Control and 0.5 μm PS-MPs exposure groups. (B) Control and 4 μm PS-MPs exposure groups. (C) Control and 10 μm PS-

MPs exposure groups. The results are expressed as means  $\pm$  SD (n = 10 mice/per group). The mean and SD summary data for quantification are shown in Table S3. *P*-Values for all comparisons are reported in Table S4. Data were detected by one-way analysis of variance (ANOVA) followed by Dunnett's multiple comparison tests.

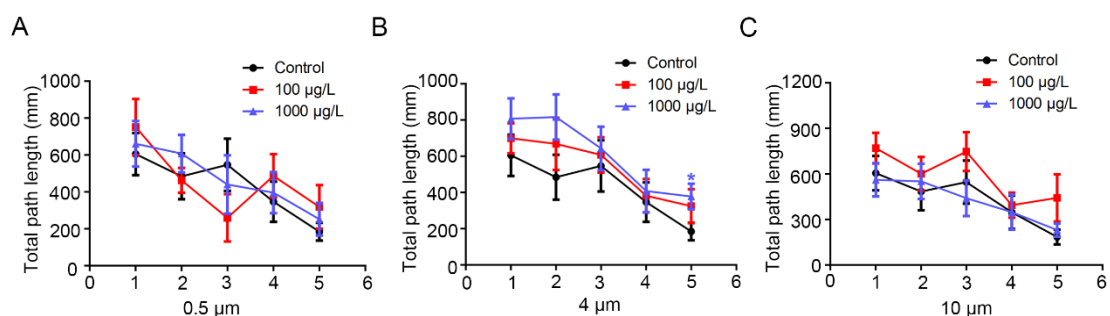

**Figure S5.** The total path length to find the hidden platform of mice on days 1-5 in Morris water maze test are shown. Circle (Control), square (100  $\mu$ g/L), triangle (1000  $\mu$ g/L). (A) Control and 0.5  $\mu$ m PS-MPs exposure groups. (B) Control and 4  $\mu$ m PS-MPs exposure groups. (C) Control and 10  $\mu$ m PS-MPs exposure groups. The results are expressed as means  $\pm$  SD (n = 10 mice/per group). The mean and SD summary data for quantification are shown in Table S3. *P*-Values for all comparisons are reported in Table S4. \**P* < 0.05 vs. control, as detected by one-way analysis of variance (ANOVA) followed by Dunnett's multiple comparison tests.

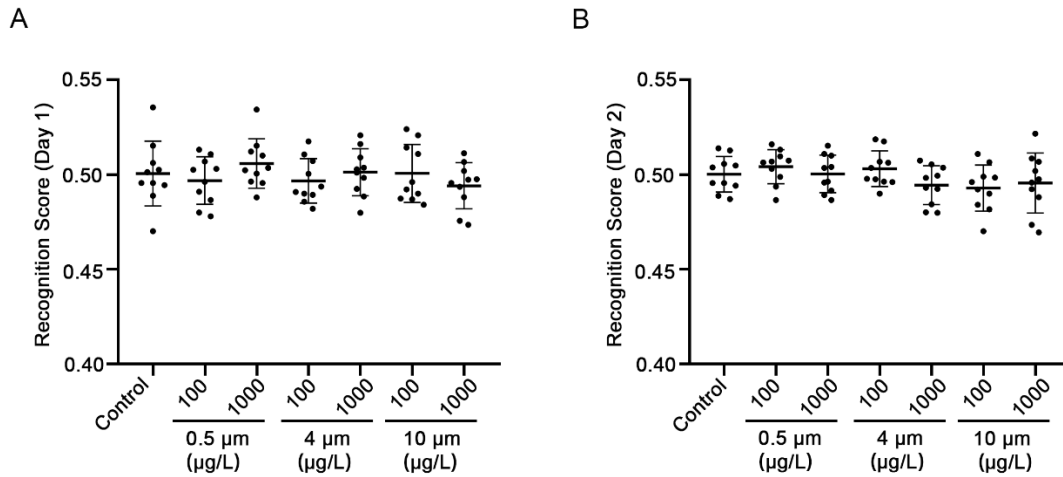

**Figure S6.** The recognition scores (time spent (s) investigating one object/time spent (s) investigating both objects in total) of mice on day 1 (A) and day 2 (B) of novel object recognition (NOR) experiment were examined (n = 10 mice/per group). The mean and SD summary data for quantification are shown in Table S3. *P*-Values for all comparisons are reported in Table S4.

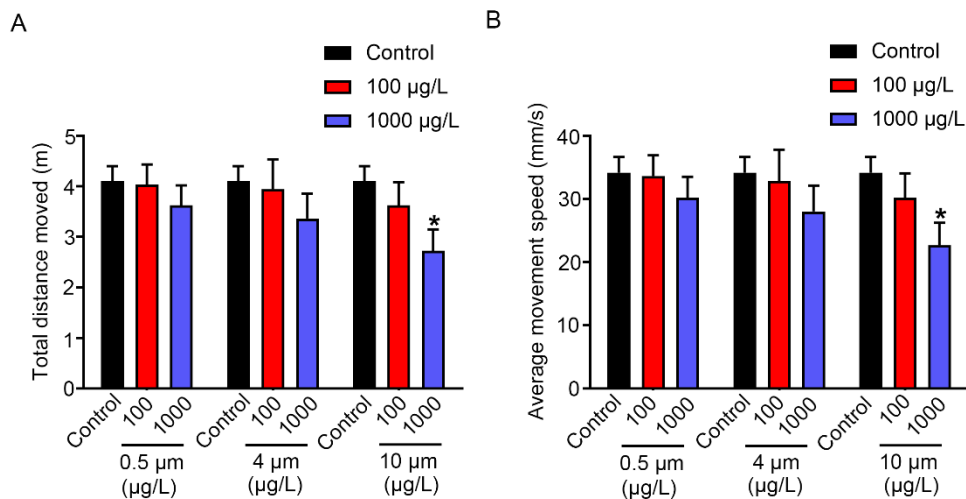

**Figure S7.** The total distance moved (A) and average movement speed (B) of mice in testing day (day 3) of the novel object recognition test are shown. The results are expressed as means  $\pm$  SD (n = 10 mice/per group). The mean and SD summary data for quantification are shown in Table S3. *P*-Values for all comparisons are reported in Table S4. \**P* < 0.05 vs. control, as

detected by one-way analysis of variance (ANOVA) followed by Dunnett's multiple comparison tests.

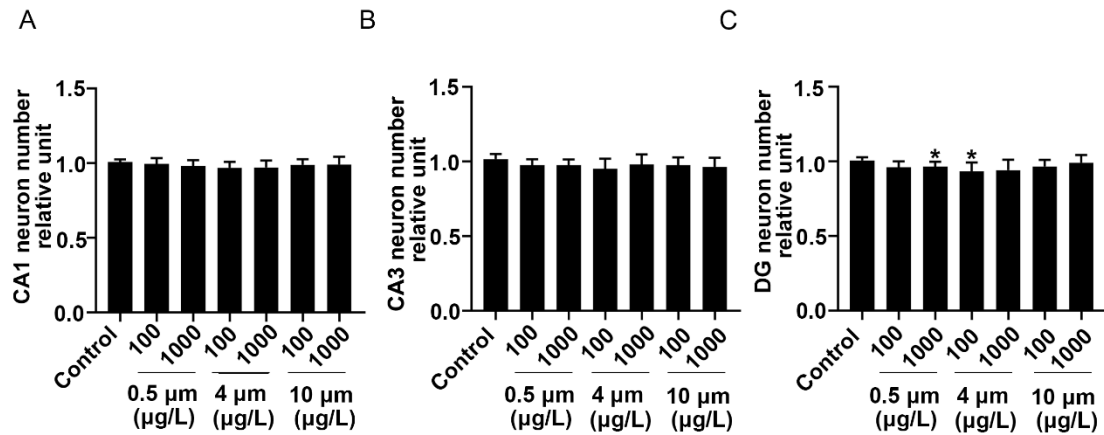

**Figure S8.** The numbers of neurons in the hippocampal cornu ammonis 1 (CA1), cornu ammonis 3 (CA3), and dentate gyrus (DG) sections were counted (n = 3 mice/group, n = 3 slides/mice). Data are shown as mean  $\pm$  SD. The mean and SD summary data for quantification are shown in Table S3. *P*-Values for all comparisons are reported in Table S4. \**P* < 0.05 compared with control, as detected by one-way analysis of variance (ANOVA) followed by Dunnett's multiple comparison tests.

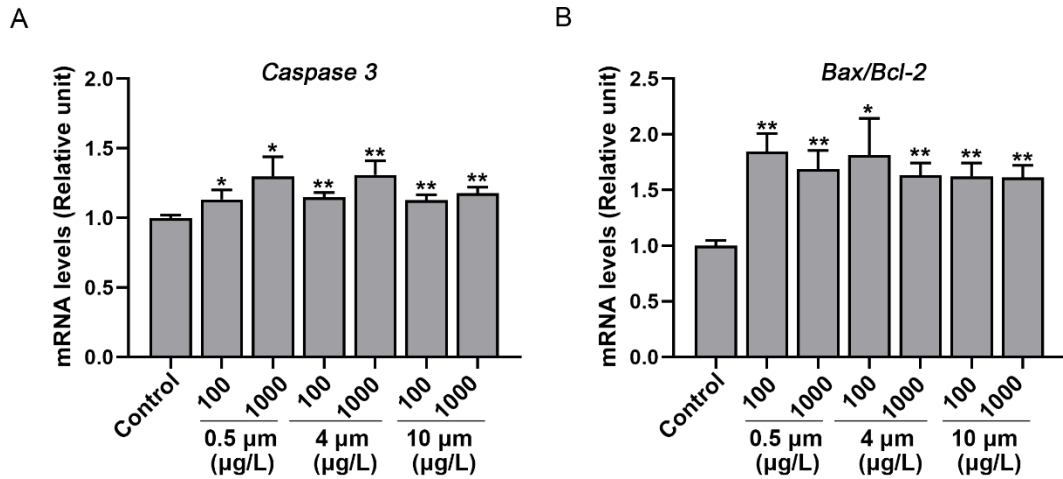

**Figure S9.** The mRNA levels of *caspase 3* (A), the *Bax/Bcl-2* mRNA ratio (B) in the hippocampus were tested with quantitative real-time PCR (qRT-PCR) by normalizing to *Gapdh*. The results are expressed as means  $\pm$  SD (n = 3, N = 3 mice/group). The mean and SD summary data for quantification are shown in Table S3. *P*-Values for all comparisons are reported in Table S4. \**P* < 0.05 and \*\**P* < 0.01 compared with the control, as detected by one-way analysis of variance (ANOVA) followed by Dunnett's multiple comparison tests.

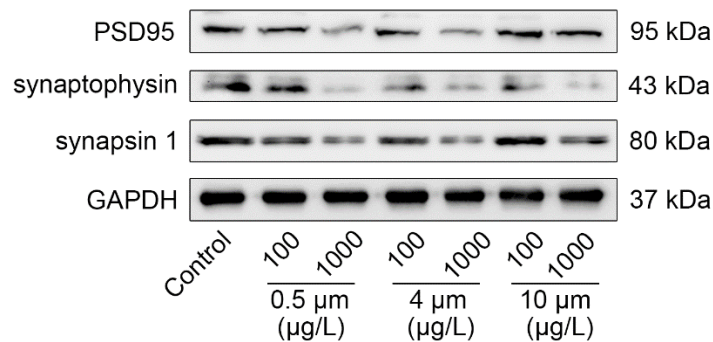

**Figure S10.** The expression of synapsin 1, synaptophysin, and PSD 95 protein in the hippocampus was measured via western blotting. The western blotting results were quantified and statistically analyzed, as shown in (Figure 7C) as mean  $\pm$  SD (n = 3, N = 3 mice/group). The mean and SD summary data for quantification of western blotting are shown in Table S3.

*P*-Values for all comparisons are reported in Table S4.

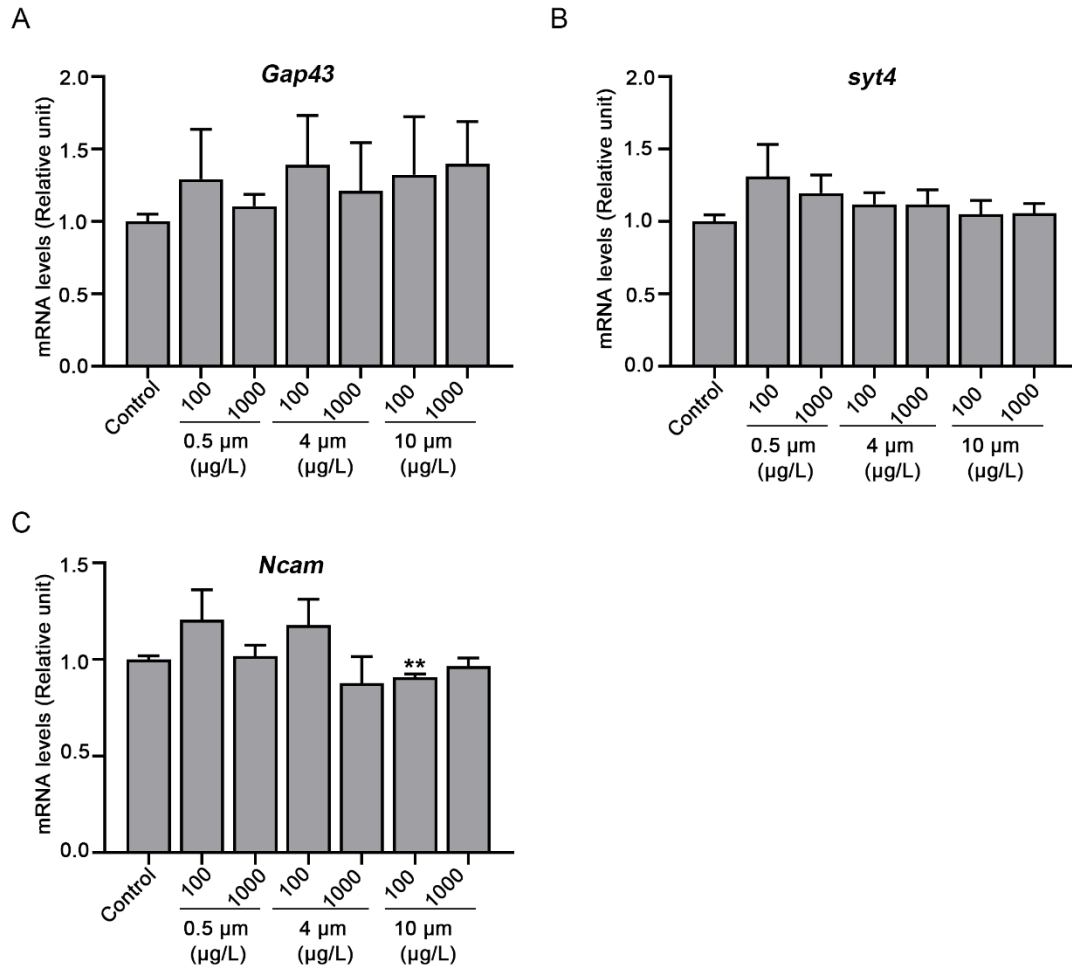

**Figure S11.** The mRNA expression levels of *Gap43*(A), *Syt 4* (B), and *Ncam*(C) were detected by qRT-PCR in the hippocampus of mice exposed to PS-MPs and control mice. Data are shown as mean  $\pm$  SD ( $n = 3$ ). The mean and SD summary data for quantification are shown in Table S3. *P*-Values for all comparisons are reported in Table S4. \*\* $P < 0.01$  compared with control, as detected by one-way analysis of variance (ANOVA) followed by Dunnett's multiple comparison tests.

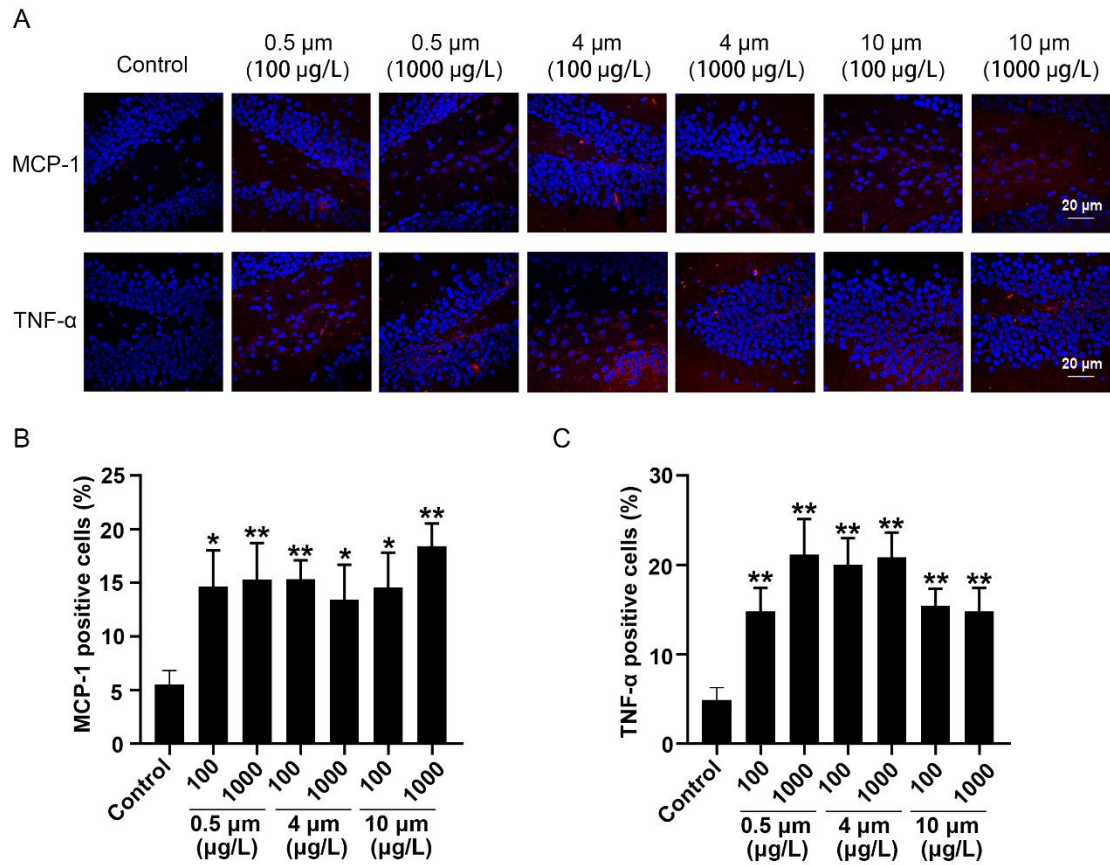

**Figure S12.** (A) A confocal fluorescence microscope was used to detect colocalization of Alexa Fluor 594-labeled MCP-1 (red)/TNF- $\alpha$  (red) and DAPI (blue) (scale bar = 20  $\mu$ m, n = 3) in the hippocampus of mice exposed to PS-MPs and control mice. (B) Percent of positivity was calculated based on the percentage of MCP-1 positive cells out of the total number of cells in an image. (C) Percent of positivity was calculated based on the percentage of TNF- $\alpha$  positive cells out of the total number of cells in an image. Data are shown as mean  $\pm$  SD (n = 3). The mean and SD summary data for quantification are shown in Table S3. *P*-Values for all comparisons are reported in Table S4. \**P* < 0.05, \*\**P* < 0.01 compared with control, as detected by one-way analysis of variance (ANOVA) followed by Dunnett's multiple comparison tests.
